# Supplementary material for: Aberrant splicing isoforms detected by full-length transcriptome sequencing as transcripts of potential neoantigens in non-small cell lung cancer
Source: PubMed Central journal article supplement (PMC7780684; doi:10.1186/s13059-020-02240-8), 2021-01-04
Supplement: 13059_2020_2240_MOESM12_ESM.pdf [file 13059_2020_2240_MOESM12_ESM.pdf]

# A Long-read RNA sequencing

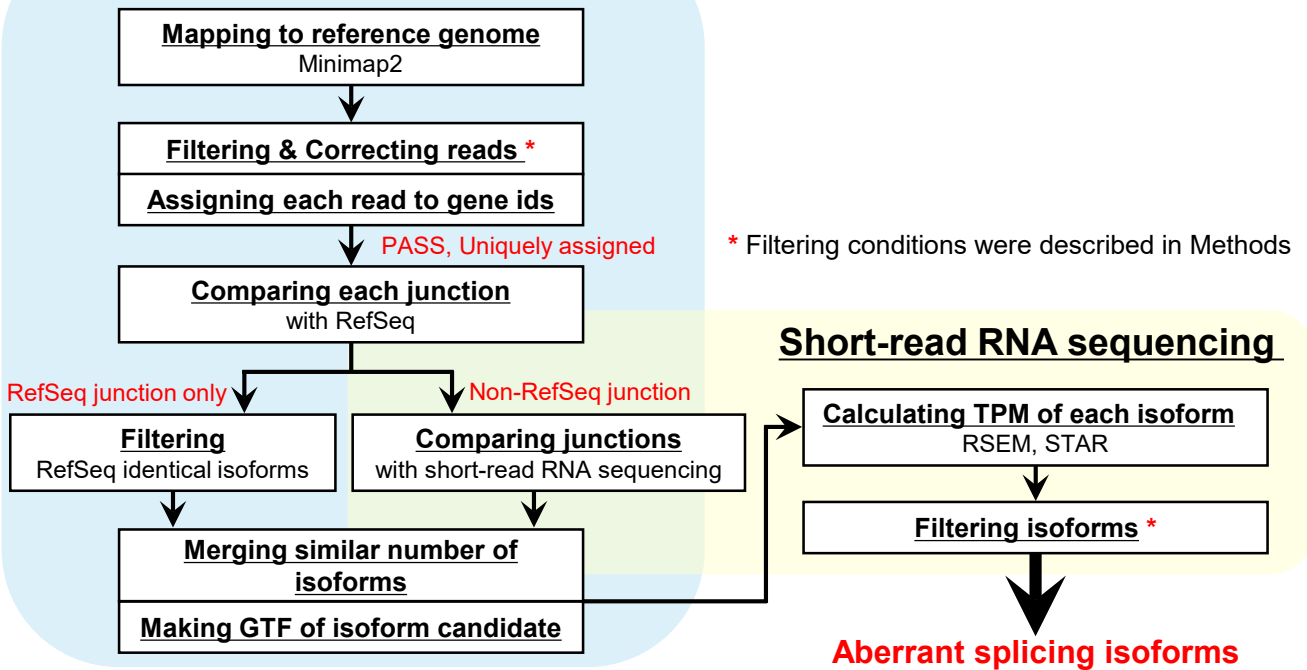

**B**

II-18

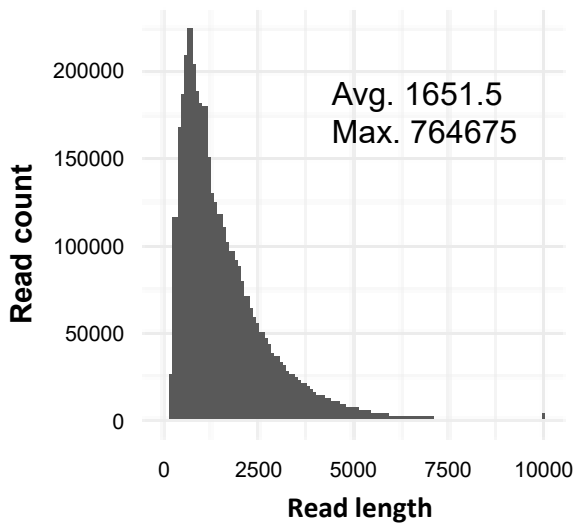

**C**

Reads covered RefSeq transcripts

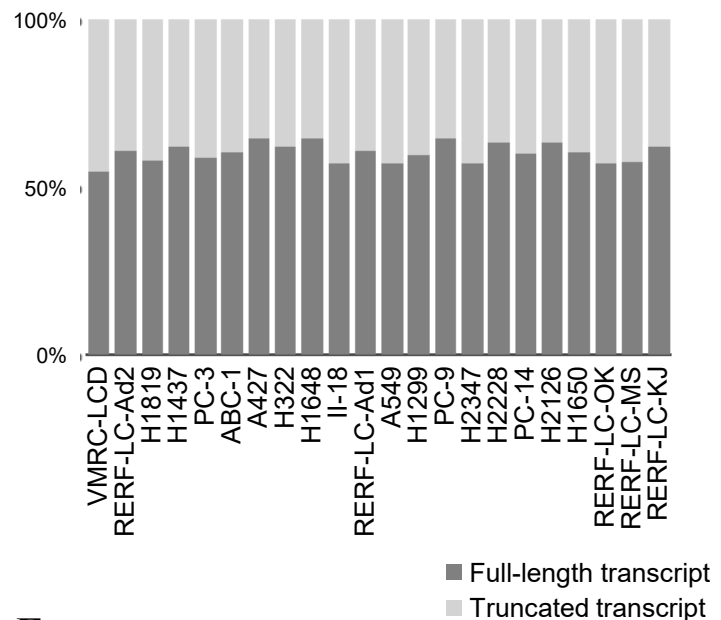

**D**

RERF-LC-Ad2

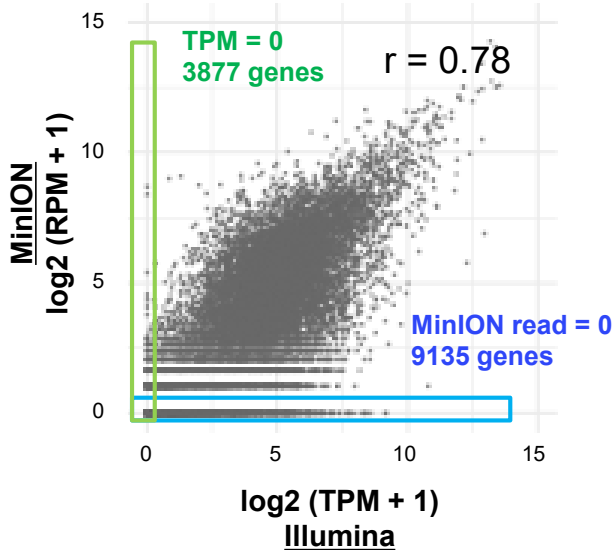

**E**

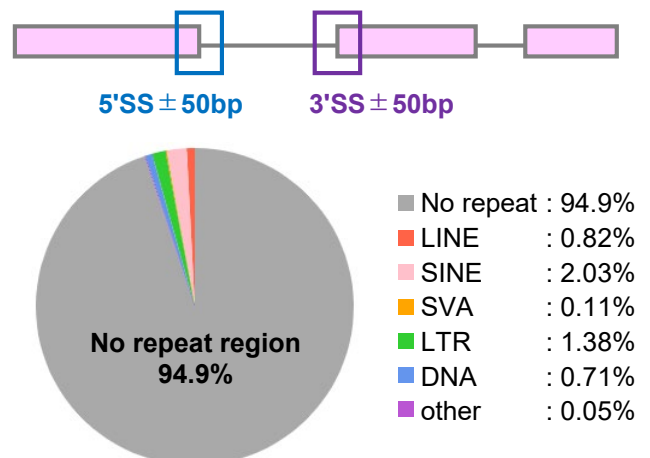

### **Fig. S1. Overview of the results of MinION sequencing**

(A) Analysis workflow for detecting splicing isoforms from MinION reads. Processes in the blue box were performed with long-read sequencing data, and processes in the yellow box were performed with short-read sequencing data. MinION reads were mapped to the reference genome using Minimap2, then filtered and corrected. Junctions in reads were compared with the RefSeq and short-read data. Merged isoform patterns were converted to a GTF file and used to calculate of the TPM of short-read RNA sequencing data. (B) Raw read length distribution of MinION sequencing in II-18. (C) The proportion of MinION reads covered the full-length of RefSeq transcripts. (D) A comparison of gene expression levels for RefSeq genes in MinION (RPM) and Illumina (TPM) in RERF-LC-Ad2. Both values + 1 were log<sub>2</sub>-transformed. The RPM of MinION reads were calculated from reads assigned to a single gene. (E) The proportion of repetitive elements detected around the novel splice sites in the isoforms.

**A427**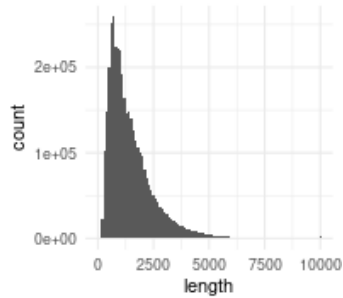**A549**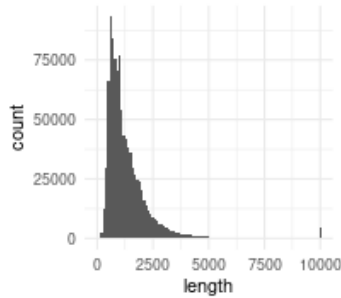**ABC-1**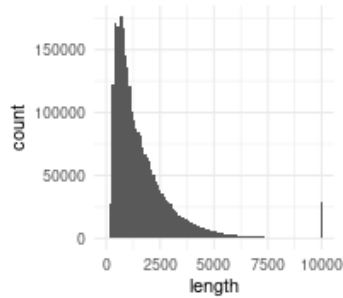**H1299**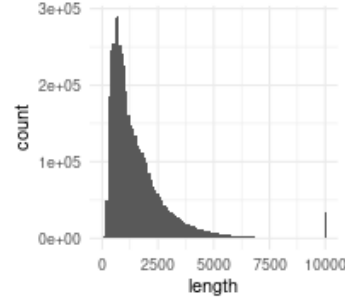**H1437**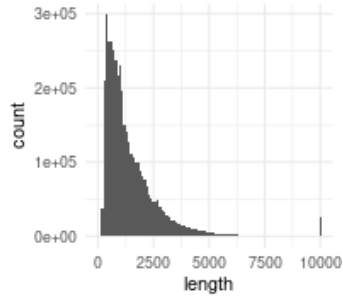**H1648**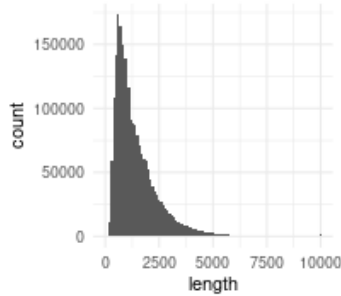**H1650**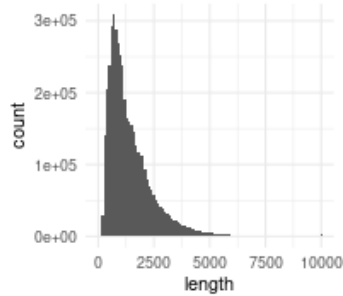**H1819**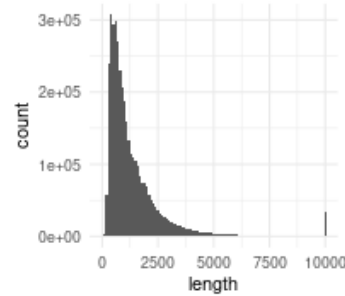**H2126**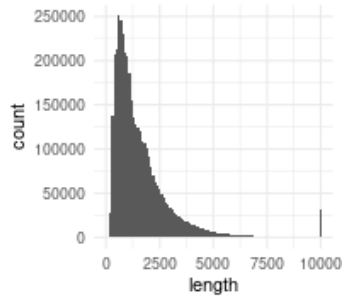**H2228**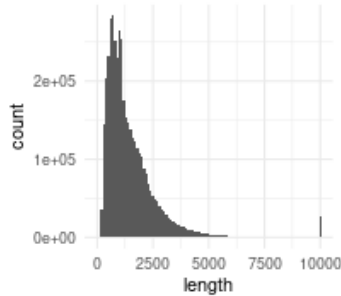**H2347**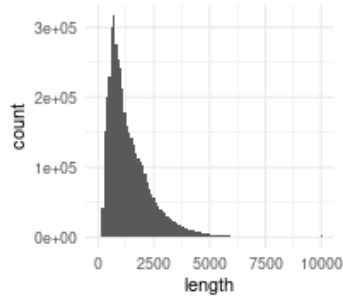**H322**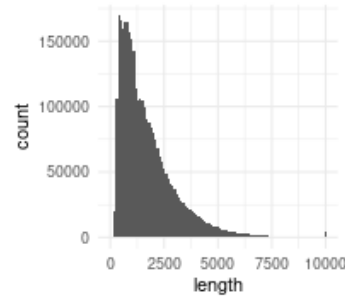**II-18**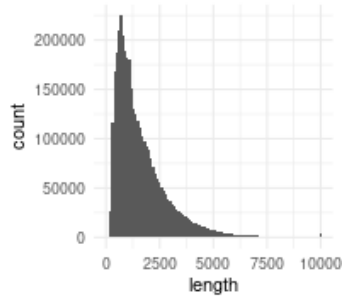**PC-3**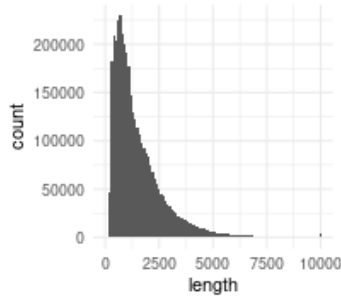**PC-9**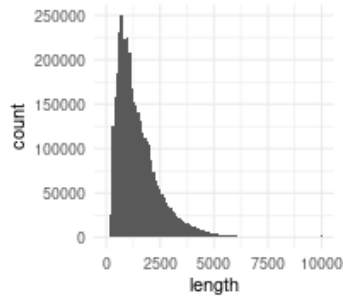**PC-14**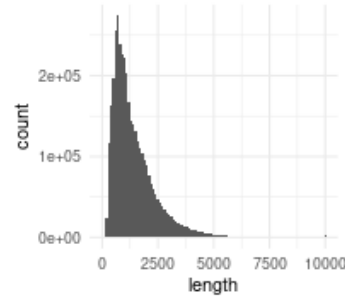**RERF-LC-Ad1**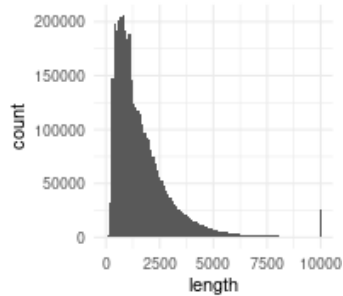**RERF-LC-Ad2**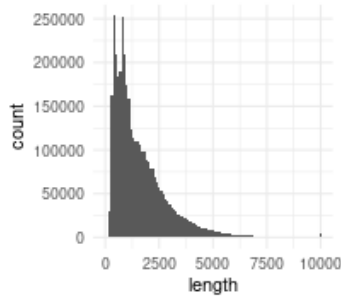**RERF-LC-KJ**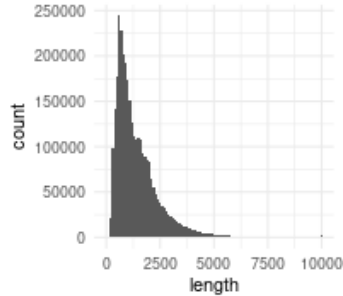**RERF-LC-MS**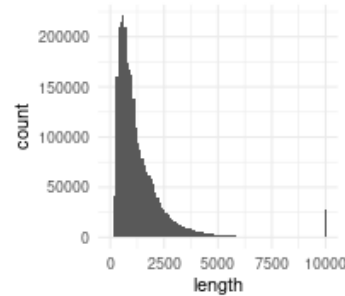**RERF-LC-OK**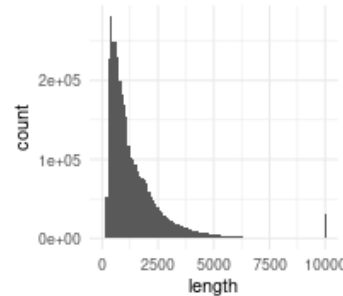**VMRC-LCD**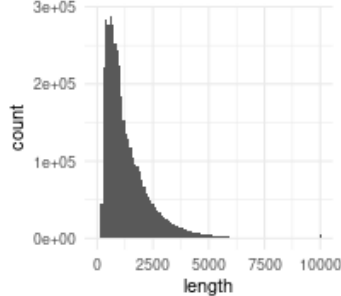

**Fig. S2. Raw read length distribution of MinION sequencing in NSCLC cell lines**  
Raw read length distribution of MinION sequencing in each cell line.

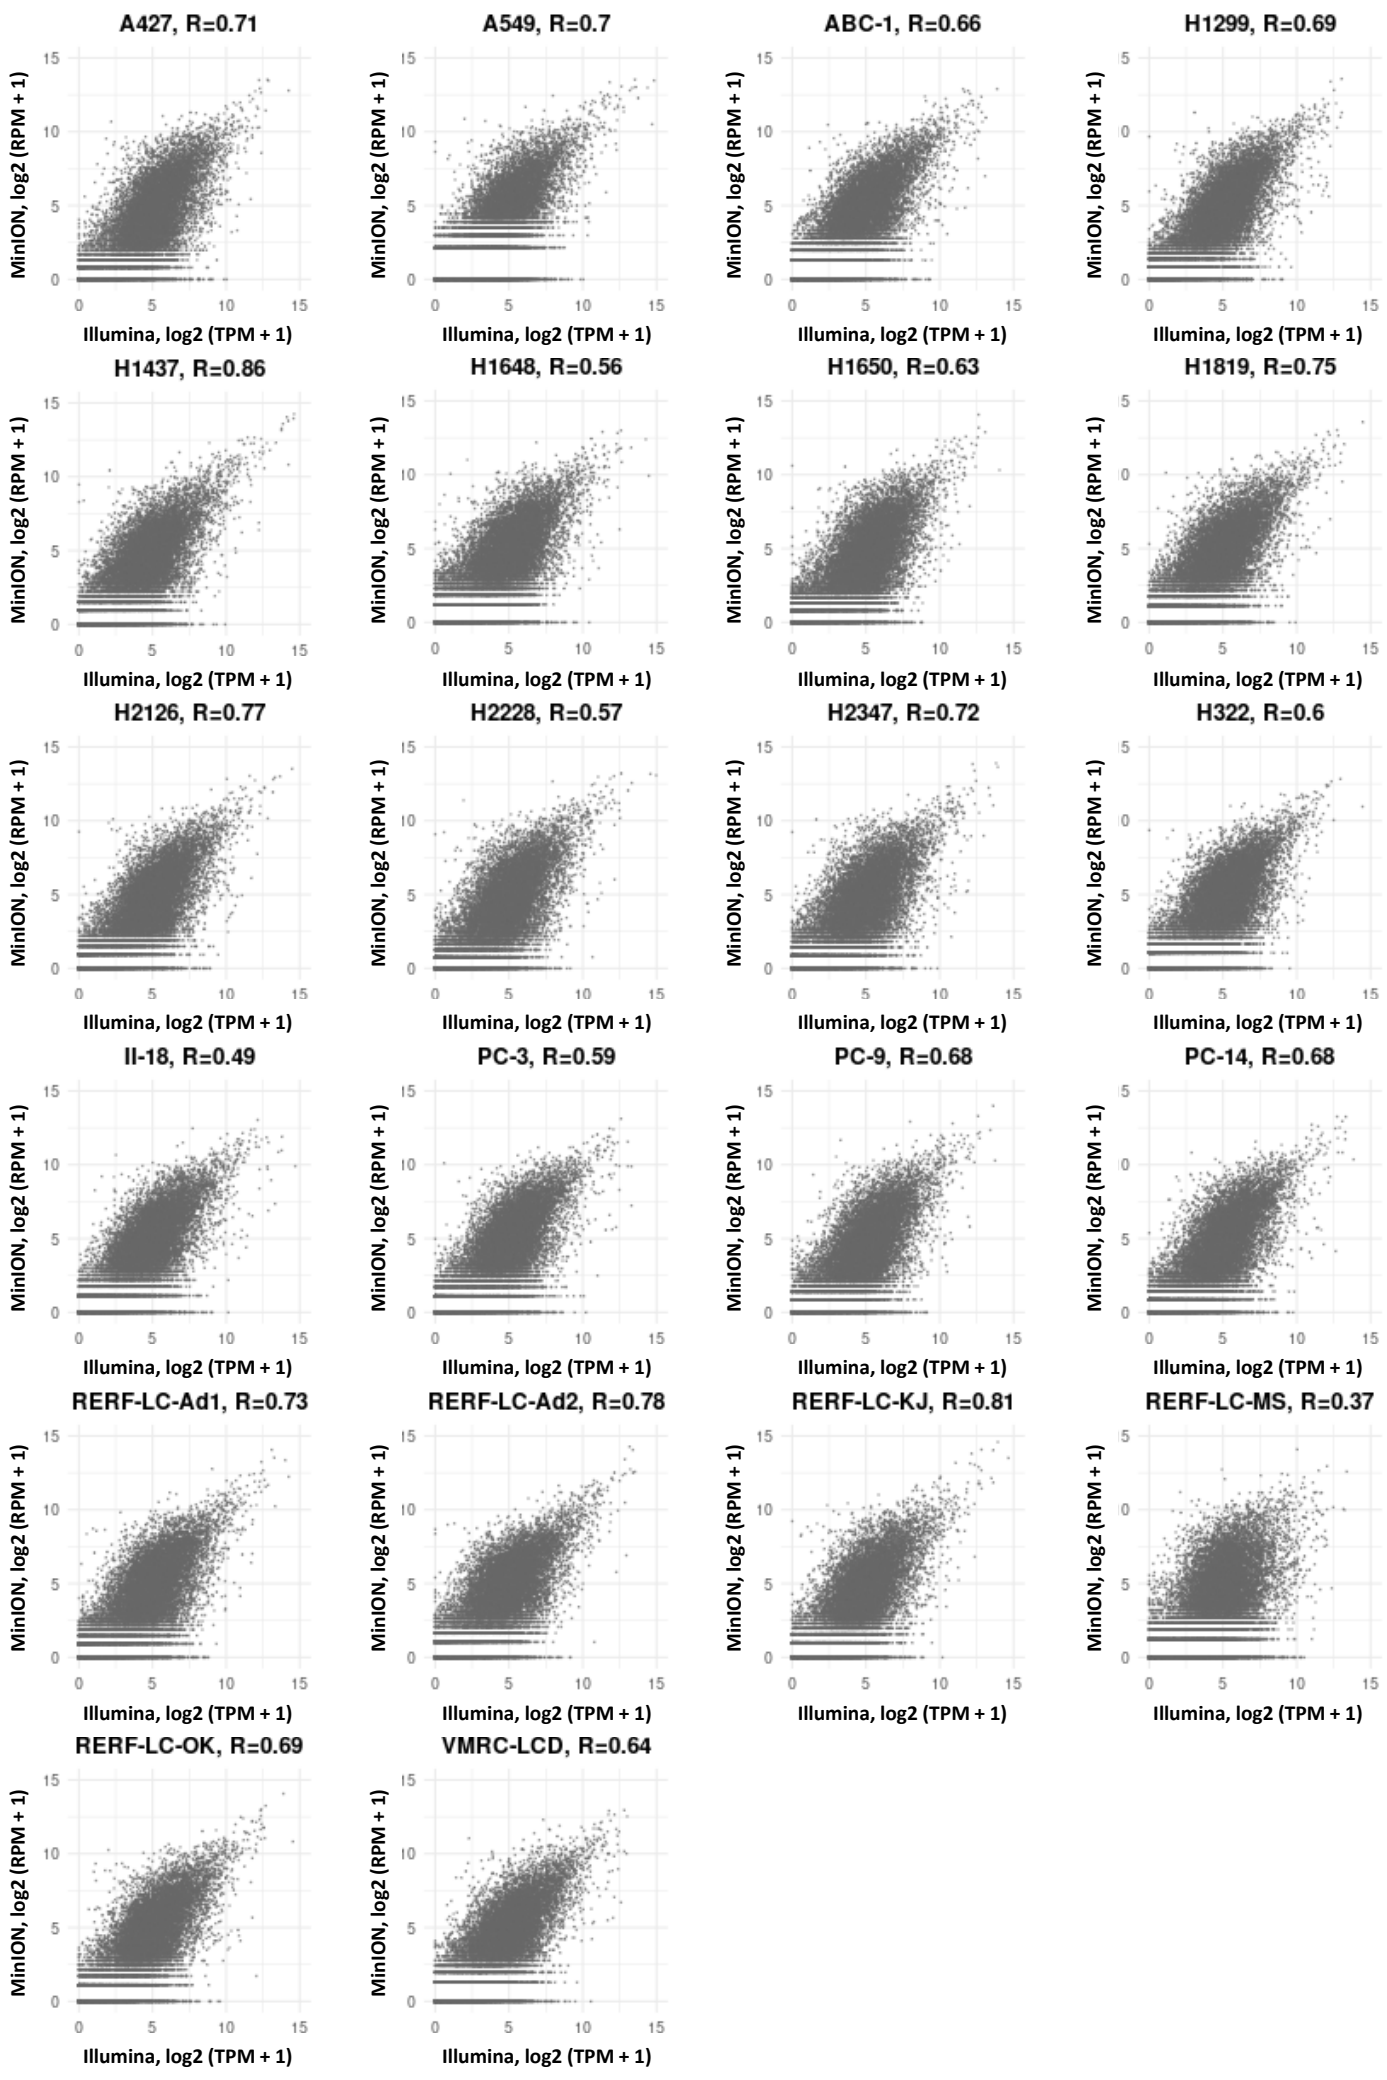

**Fig. S3. Comparison of the gene expression levels for RefSeq genes in MinION and Illumina**  
Comparison of gene expression levels for RefSeq genes in MinION (RPM) and Illumina (TPM). Both values + 1 were log<sub>2</sub>-transformed. RPM of MinION reads were calculated from reads assigned to a single gene.

**A**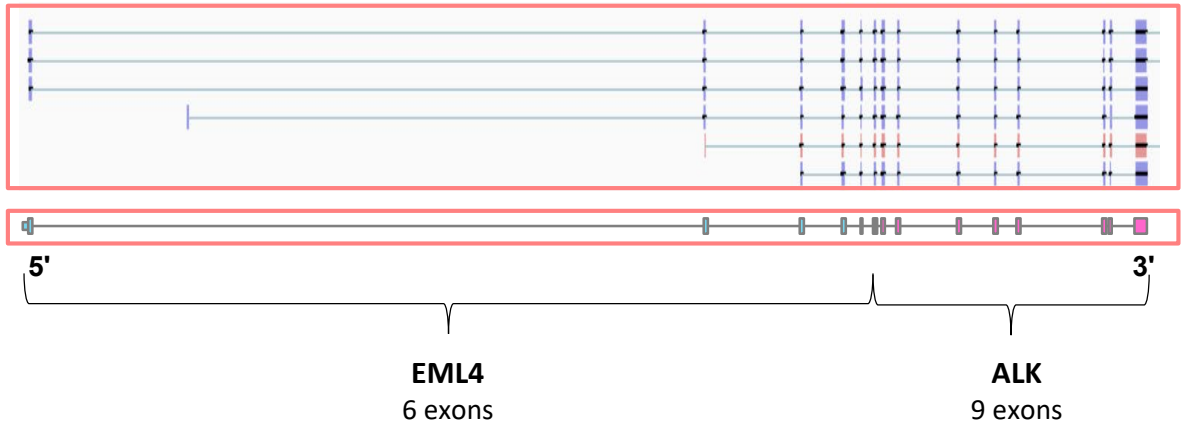**B**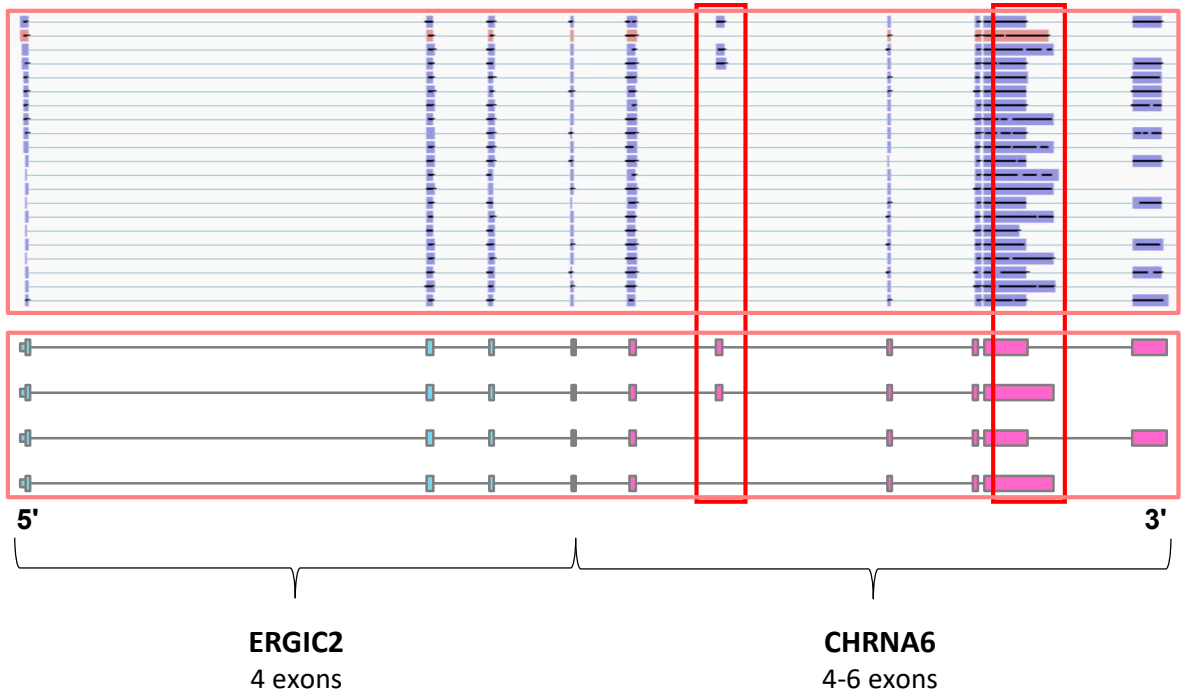

**Fig. S4. Full-length structures of fusion-genes in cell lines**

(A) The full-length structure of EML4-ALK in H2228. (B) The full-length structure of ERGIC2-CHRNA6 in H1437. Some MinION reads showed an unannotated exon and an alternative last exon in CHRNA6 (shown in red boxes).

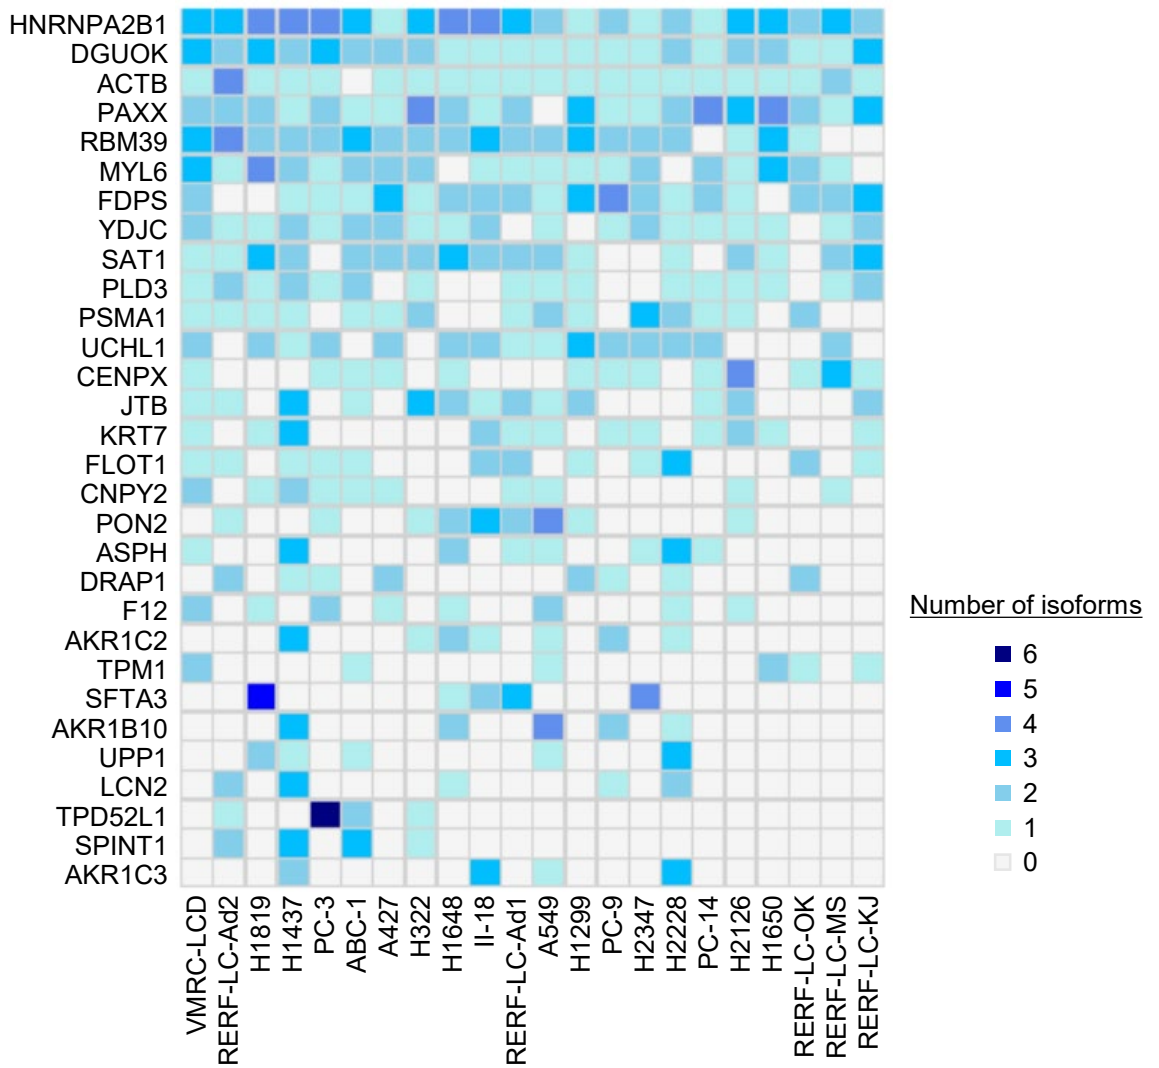

**Fig. S5. Heatmap for genes with commonly expressed isoforms in cell lines**

Heatmap showing the number of isoforms per gene that were expressed with at least five cell lines in common.



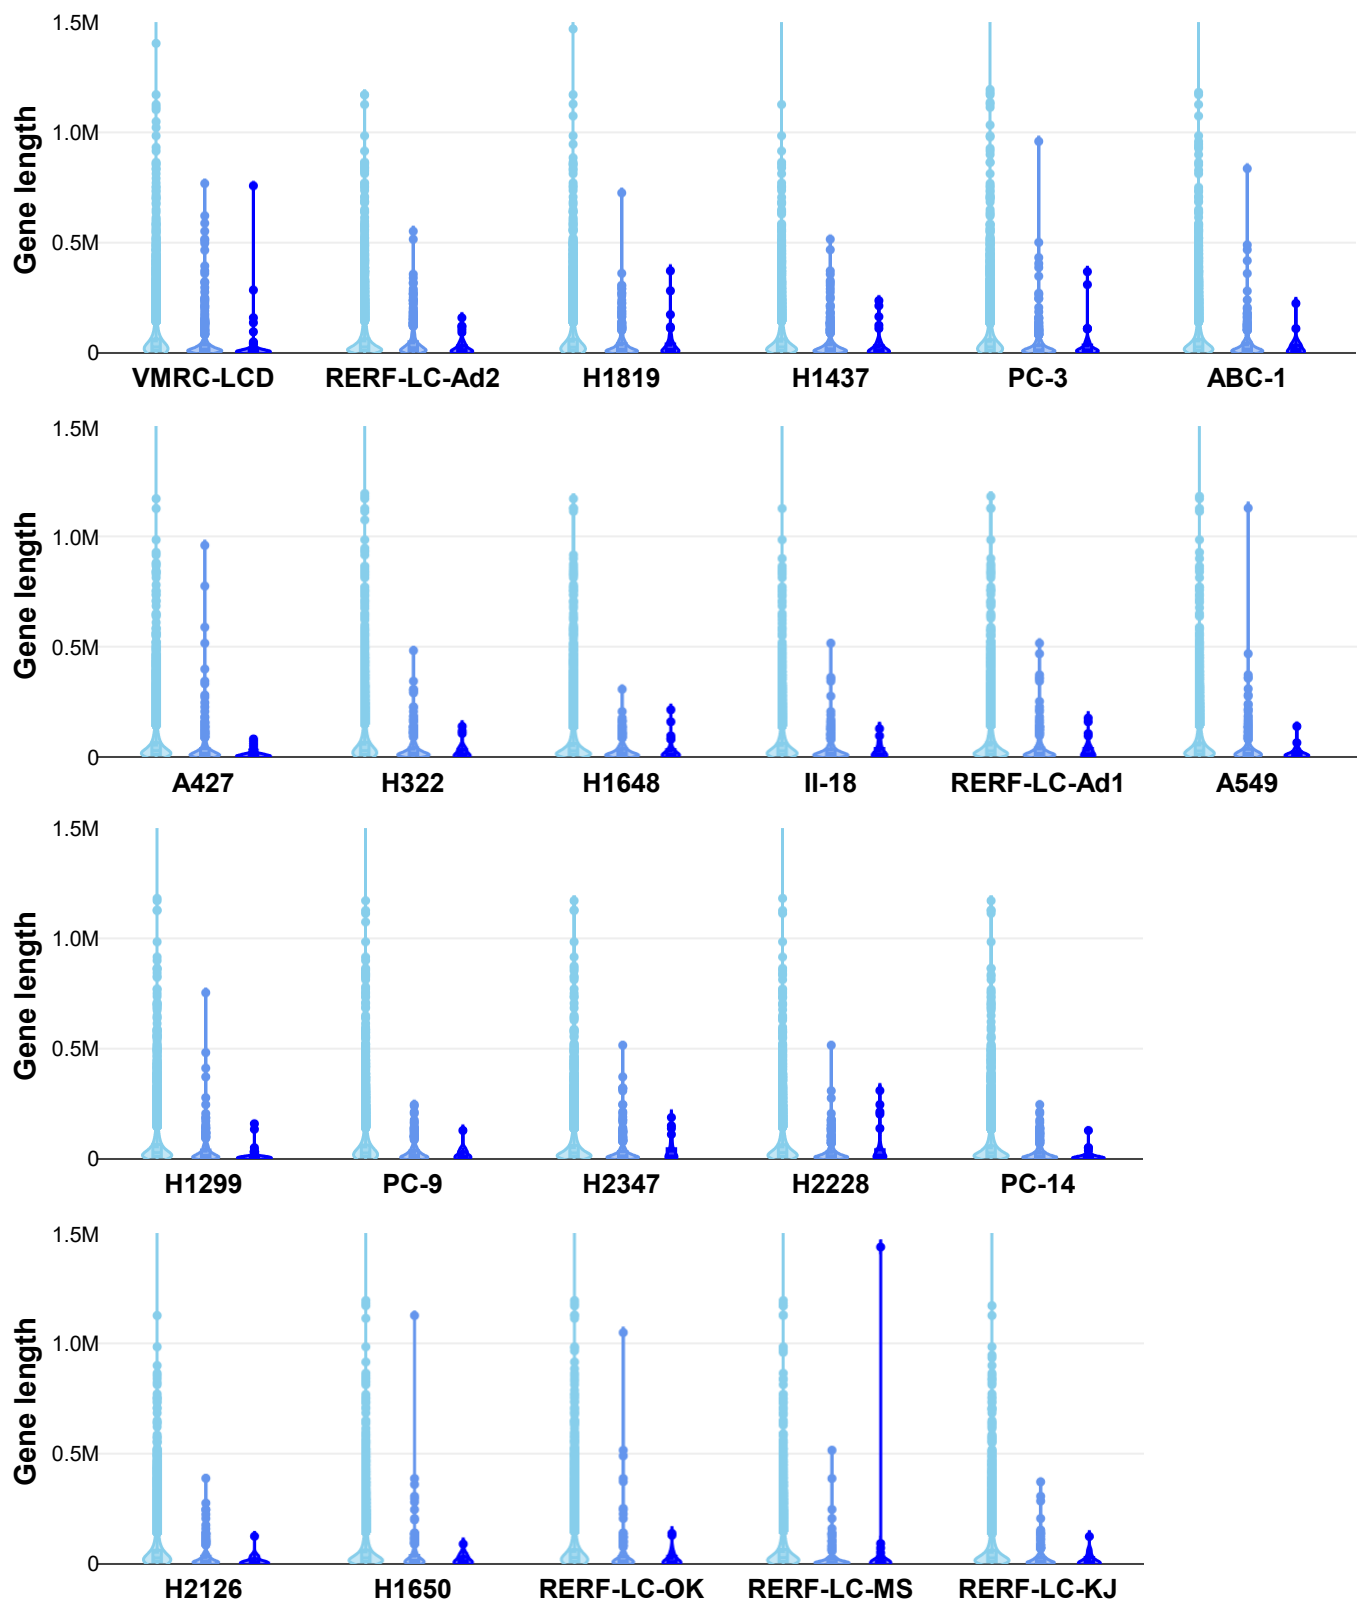

**Fig. S6. Distribution of the lengths of genes with isoforms in cell lines**

Violin plots of gene lengths for each cell line. Genes were divided into three groups: genes without isoforms, genes with one isoform, and genes with two or more isoforms (shown in light blue, pale blue, and blue, respectively).

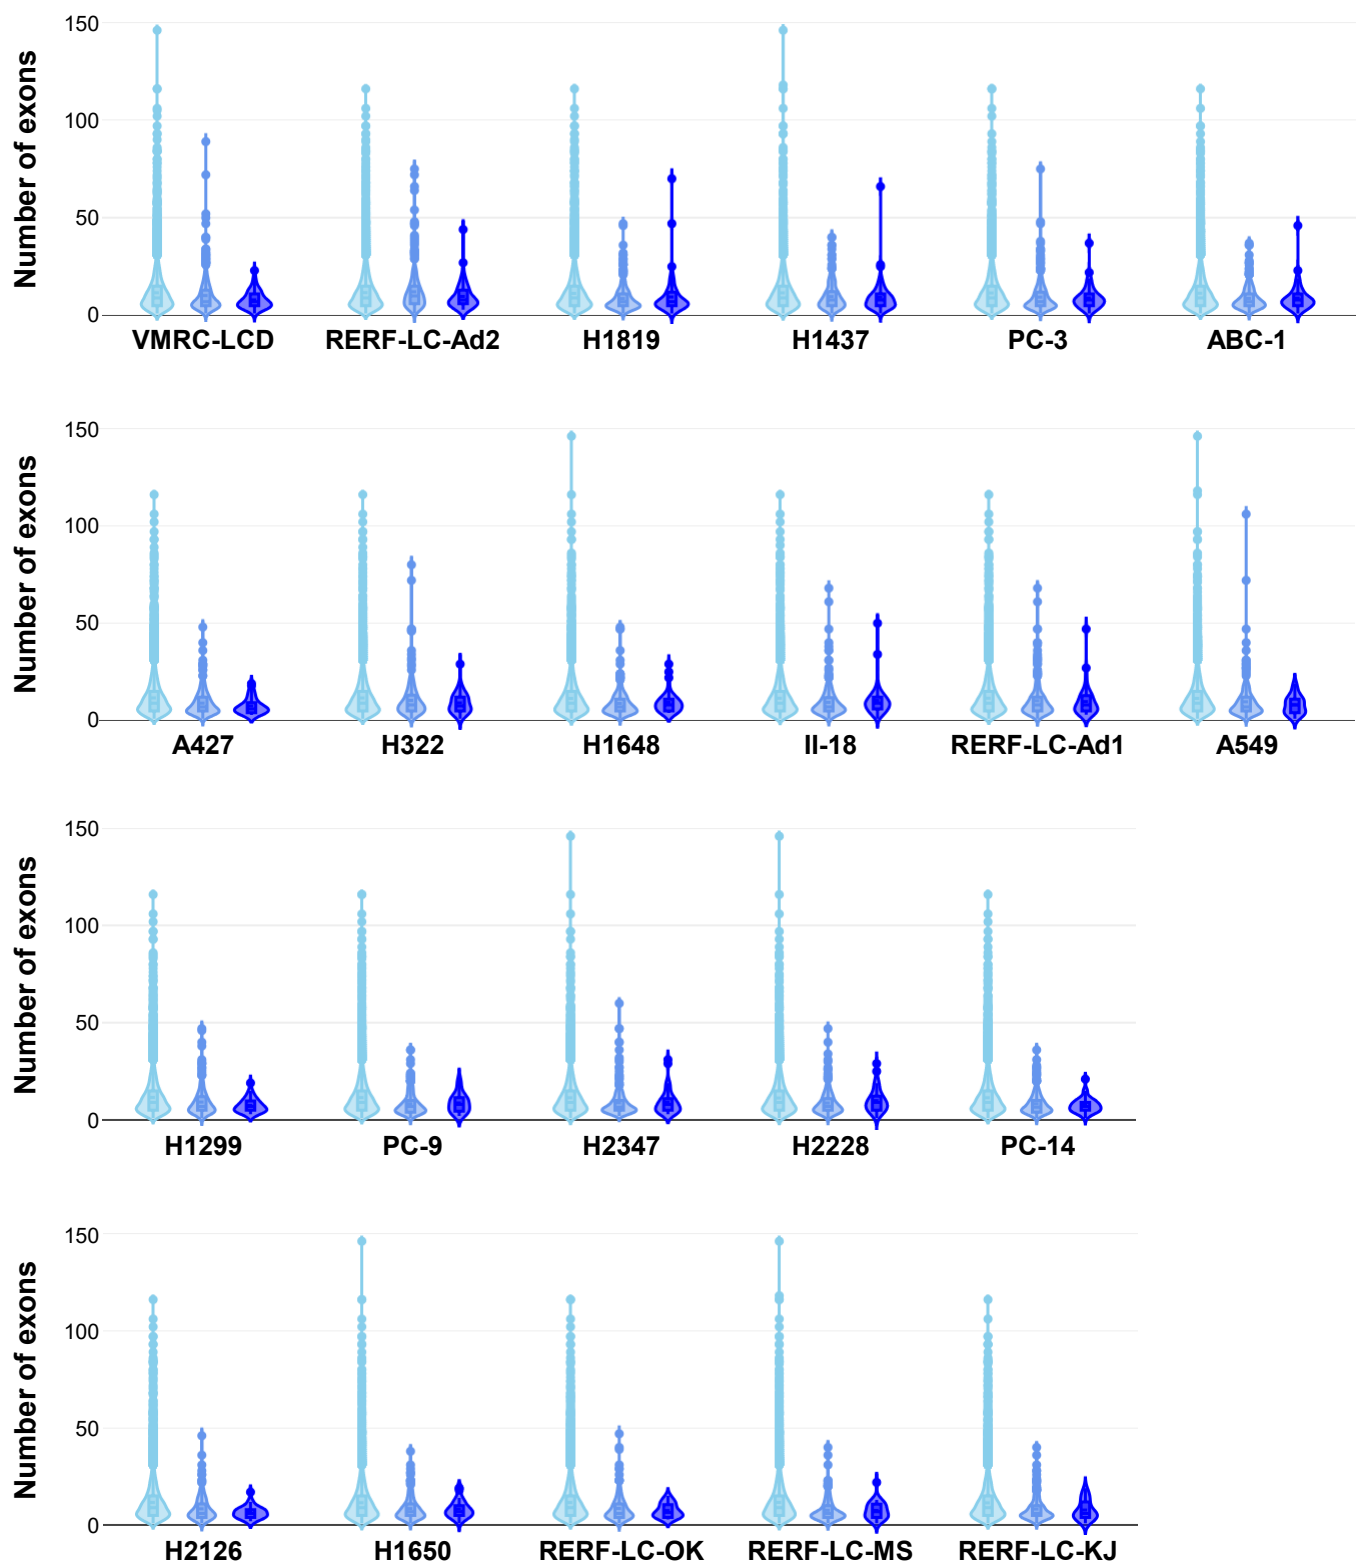

**Fig. S7. Distribution of the number of exons in genes with isoforms in cell lines**

Violin plots of the number of exons for each cell line. The plots are represented in a similar manner as described for Fig. S6.

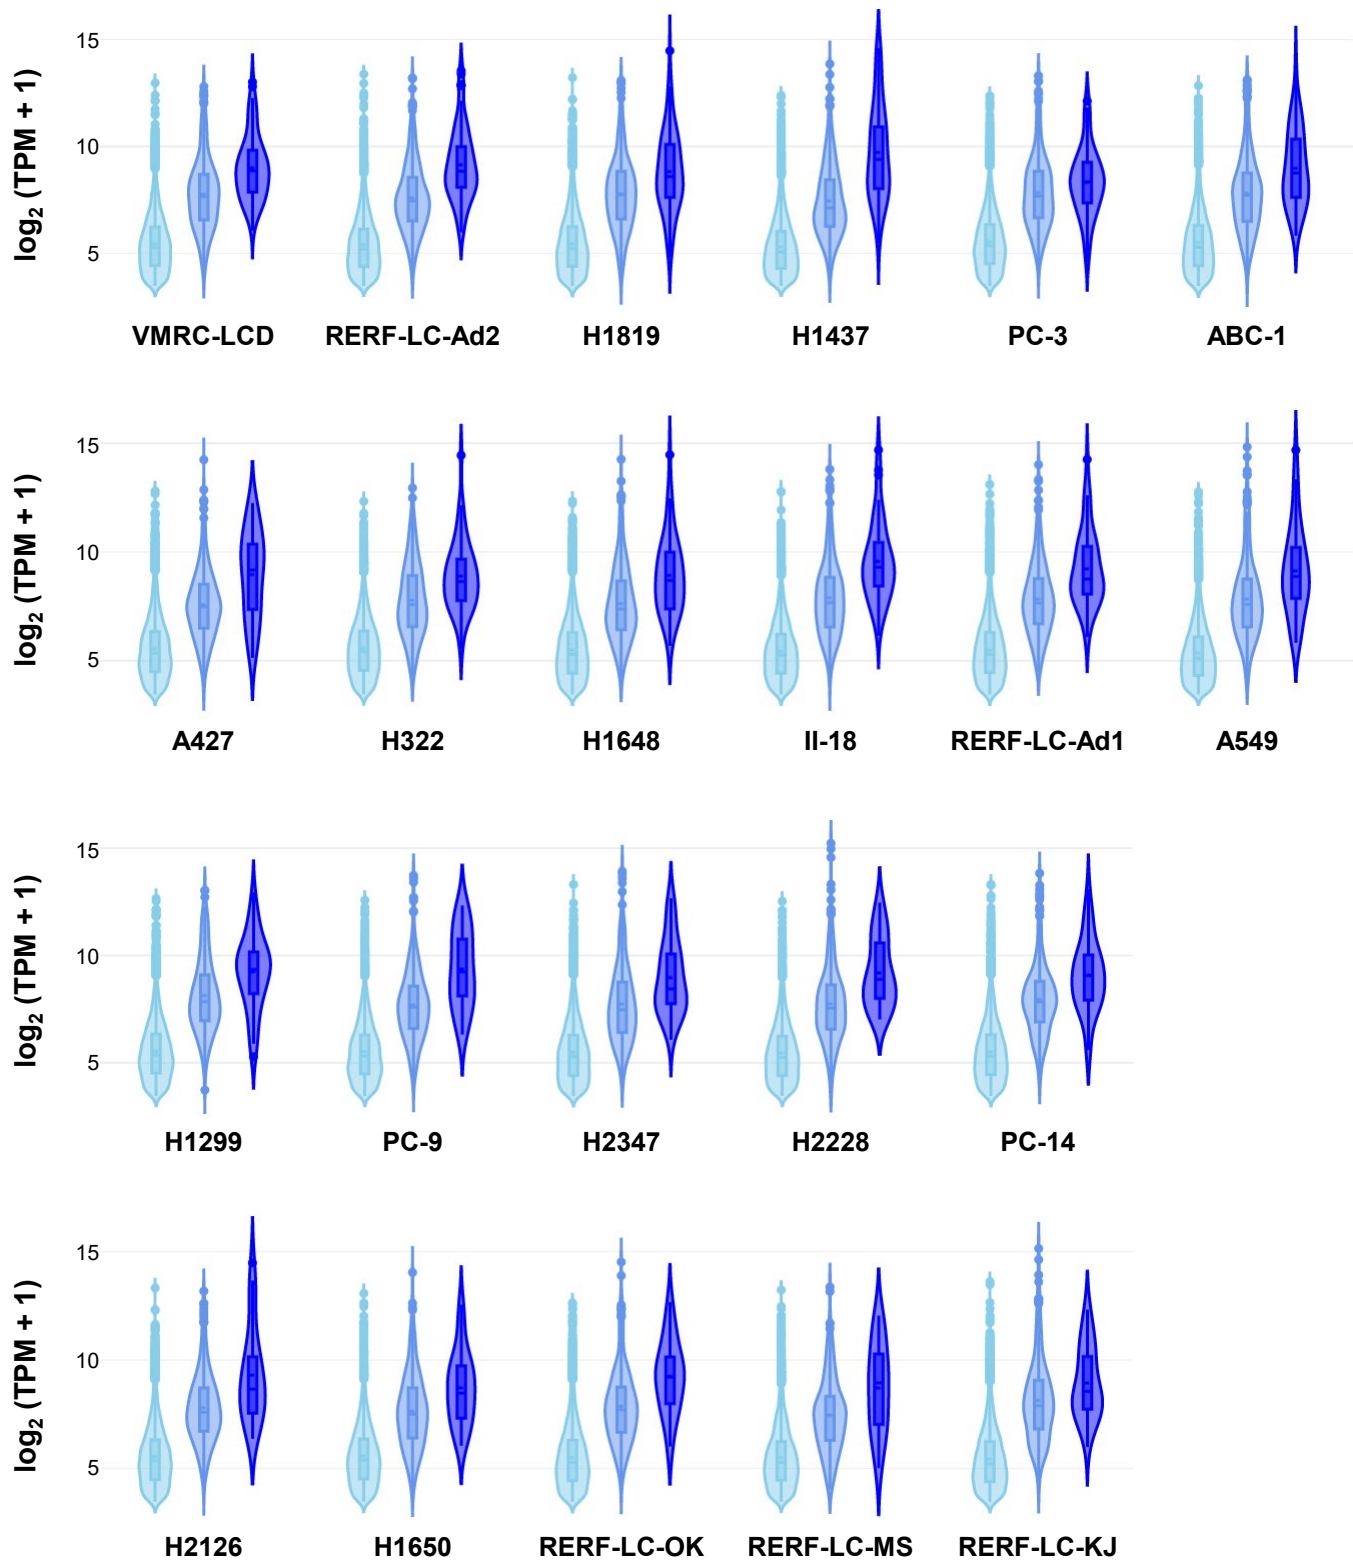

**Fig. S8. Distribution of gene expression levels of genes with isoforms in cell lines**  
 Violin plots of gene expression levels for each cell line. Plots are represented in a similar manner as described for Fig. S6.

A

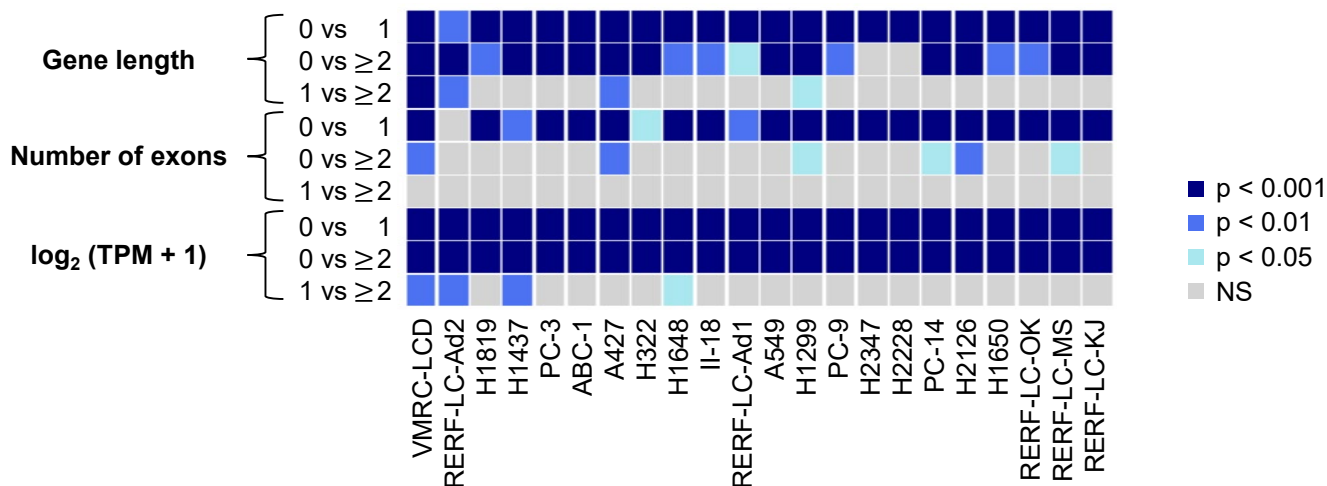

B

Gene's TPM

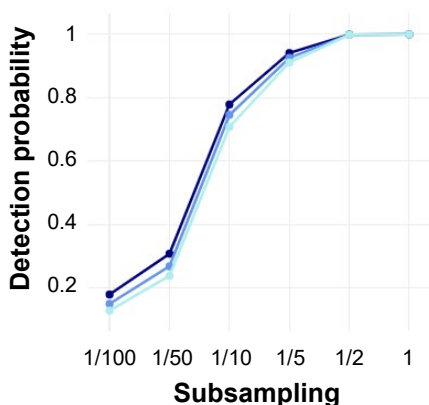

TPM

- High (322-)
- Middle (115-322)
- Low (6-115)

C

Isoform reads ratio

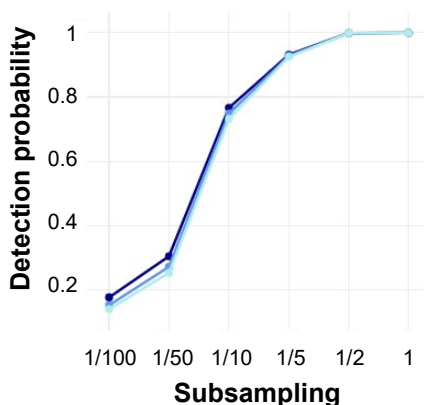

Ratio

- High (53.6%-)
- Middle (1.5-53.6%)
- Low (0.2-1.5%)

D

Isoform reads

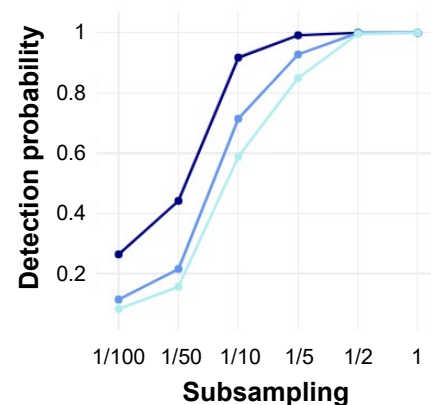

Reads

- High (16-)
- Middle (10-16)
- Low (8-10)

### Fig. S9. Summary of the results of comparison for genes with isoforms in cell lines

(A) Heatmap showing the p-values for the distributions of lengths, exons, and expression levels of genes with isoforms for each cell line shown in **Supplementary Figs. 5-8**. P-values were calculated using Dunn–Bonferroni post-hoc tests. (B-D) The detection probability for each isoform during the subsampling of MinION reads in VMRC-LCD. We divided the isoforms into three classes, High, Middle, and Low for each of the three categories as follows; (B) TPM: calculated from short-read RNA sequencing data; (C) isoform-reads ratio: [the number of MinION reads covering the isoform pattern] / [the total number of MinION reads assigned to the gene]; (D) isoform-reads: the number of MinION reads covering the isoform pattern. The separation was made so that the numbers of the entries for each category should be approximately the same.

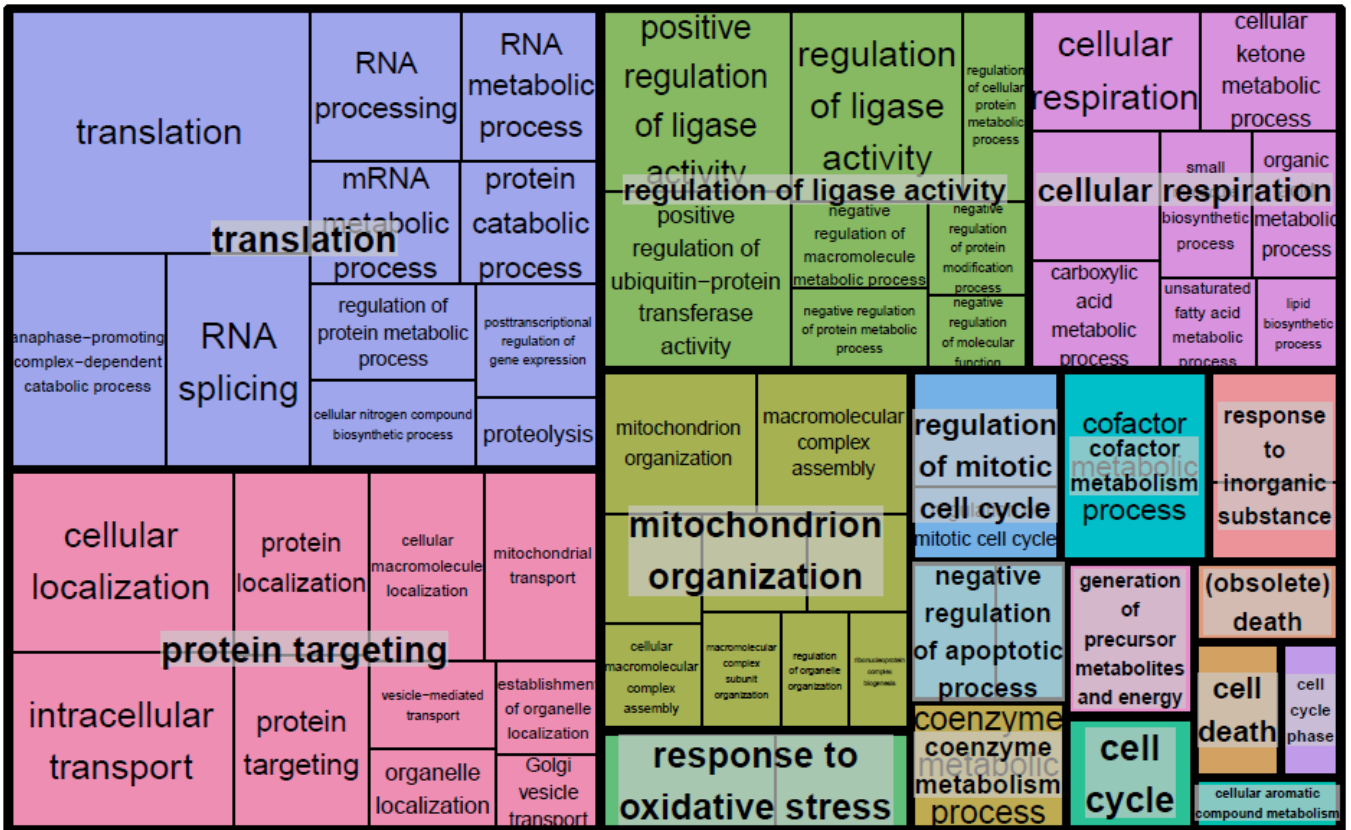

**Fig. S10. Gene ontology analysis for genes with isoforms in cell lines**

The results of gene ontology enrichment analysis were visualized using a REVIGO treemap. The panel sizes in the treemap are inversely proportional to the p-values.

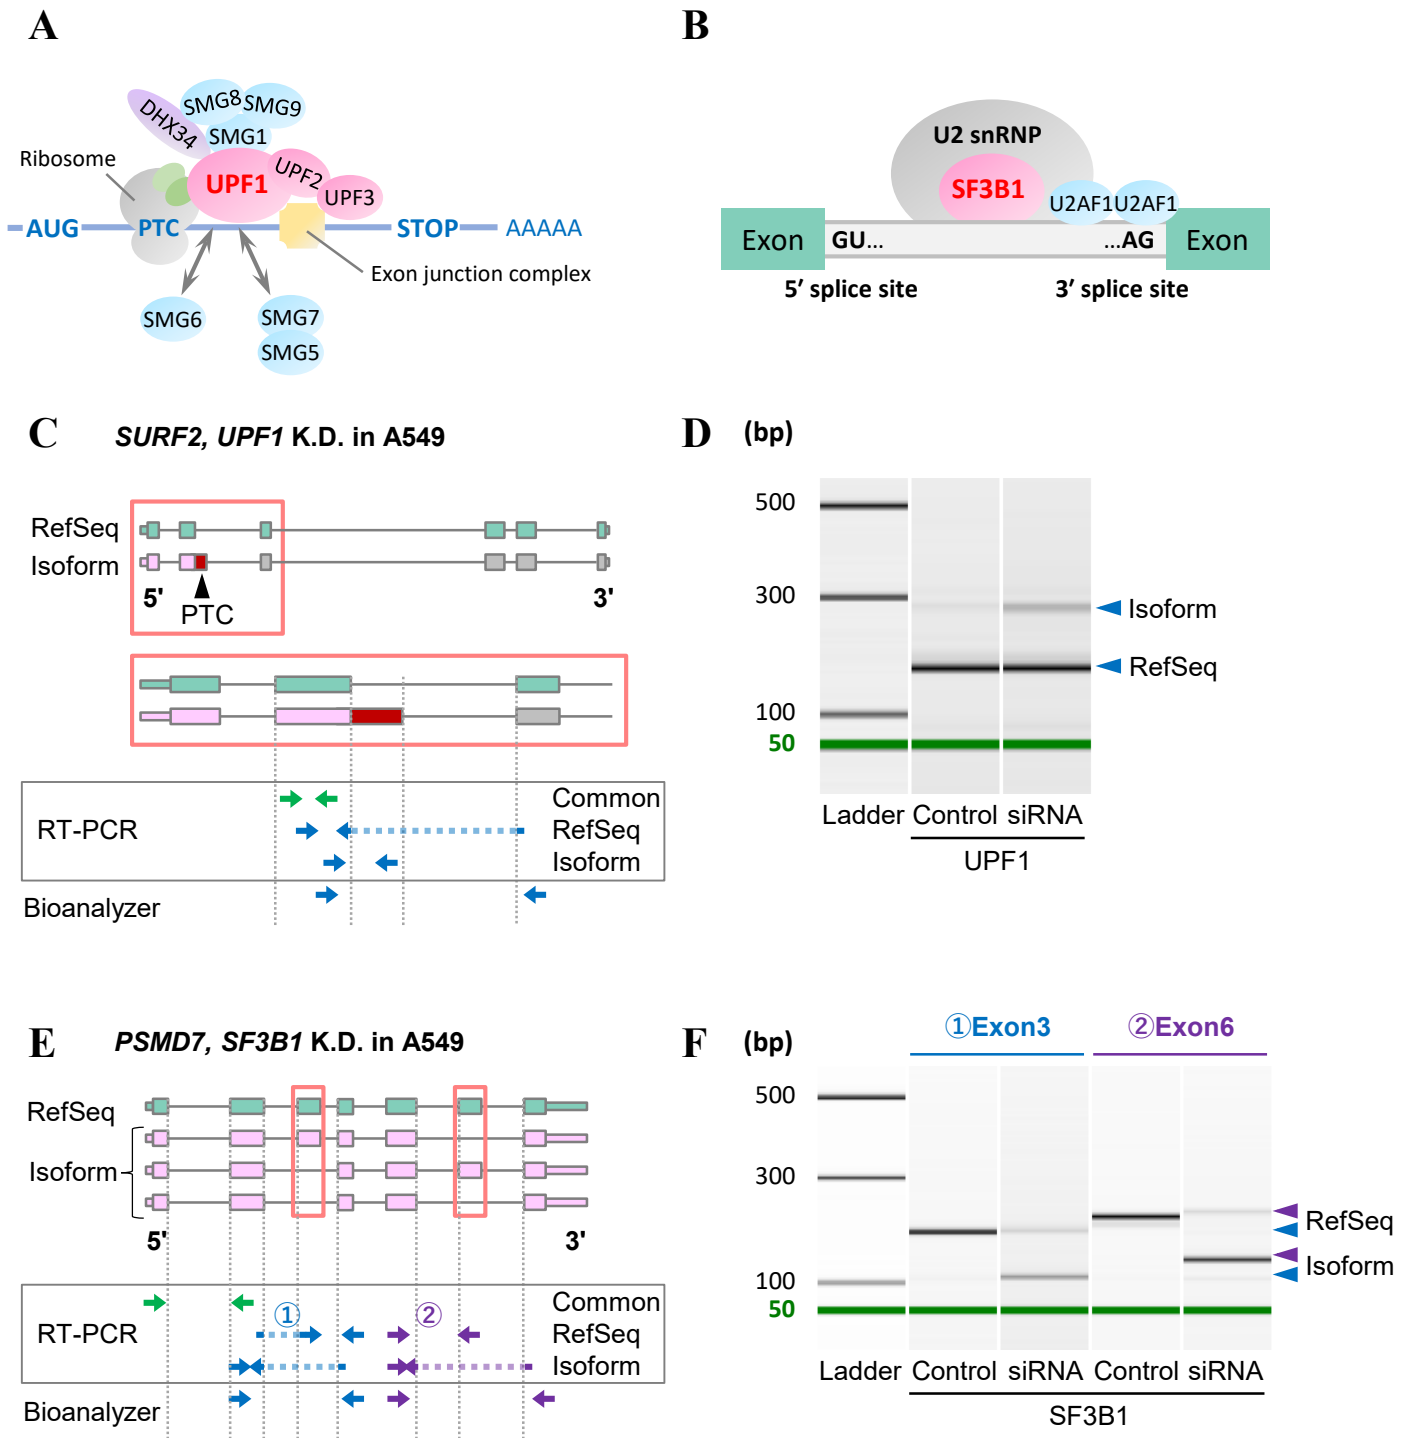

**Fig. S11. The effect of *UPF1* and *SF3B1* knockdown in A549**

(A) A simplified model of NMD complexes. *UPF1* recognized transcripts containing PTC and recruited several NMD factors. (B) A simplified model of the U2 snRNP complex. U2 snRNP complex containing *SF3B1* was recruited at the 3' splice site. (C) The full-length structure of splicing isoforms of *SURF2* and primer sets used for detecting RefSeq- or isoform-specific regions in exon 2 (blue arrows) by RT-PCR and Bioanalyzer. Primers for common regions (green arrows) were used for normalization. (D) The results of the DNA electrophoresis of *UPF1*-depleted A549 using the Bioanalyzer. Arrows indicate RefSeq- or isoform-specific PCR products of *SURF2*. (E) The full-length structure of the splicing isoforms of *PSMD7* and primer sets for detecting RefSeq- or isoform-specific regions in exon 3 (blue arrows) and exon 6 (purple arrows) by RT-PCR and the Bioanalyzer. Primers for common regions were used for normalization. (F) The results of DNA electrophoresis in *SF3B1*-depleted A549 using the Bioanalyzer. Arrows indicate RefSeq- or isoform-specific PCR products of *PSMD7*.

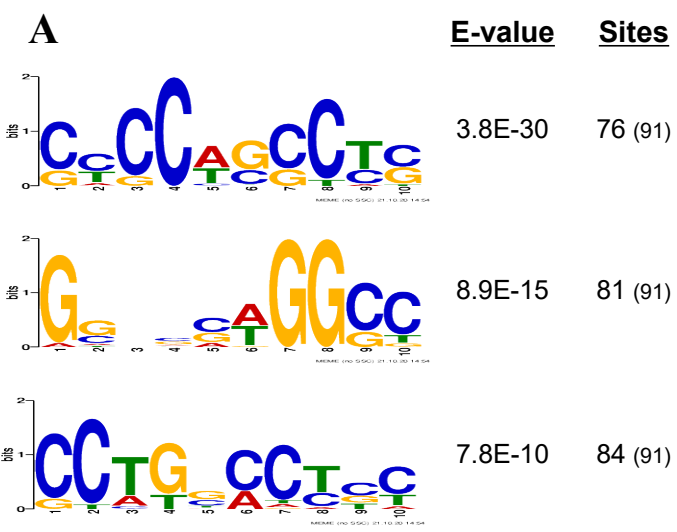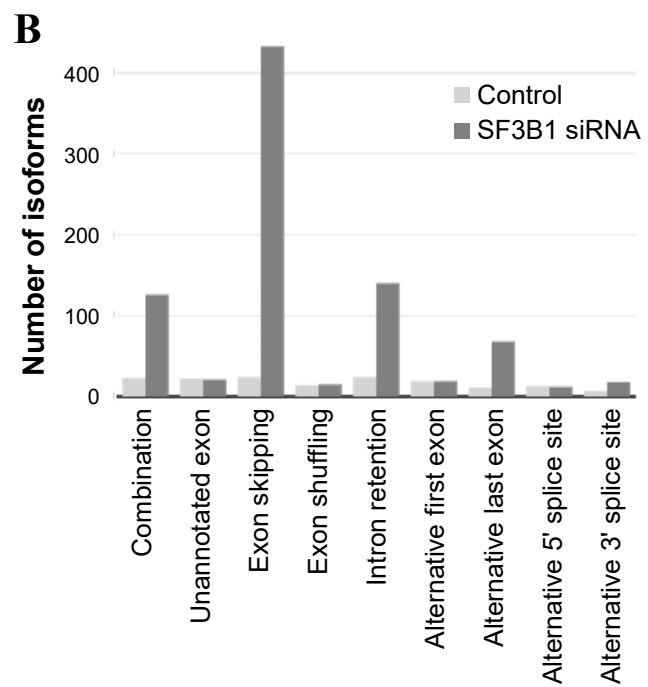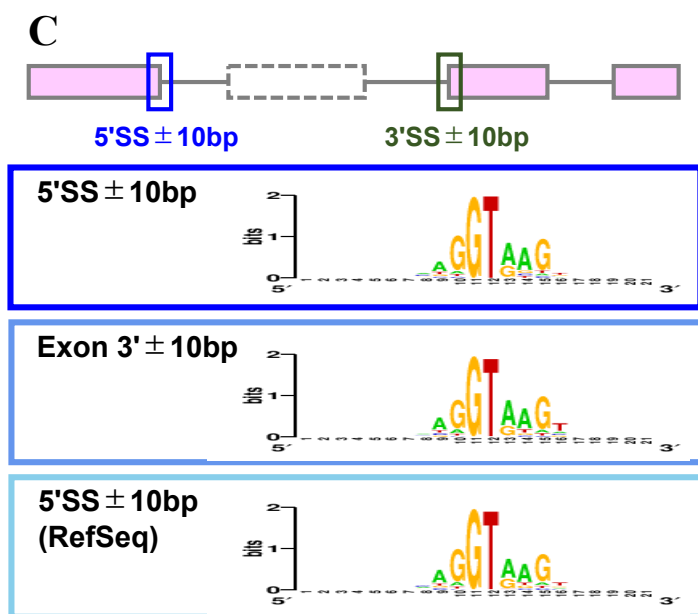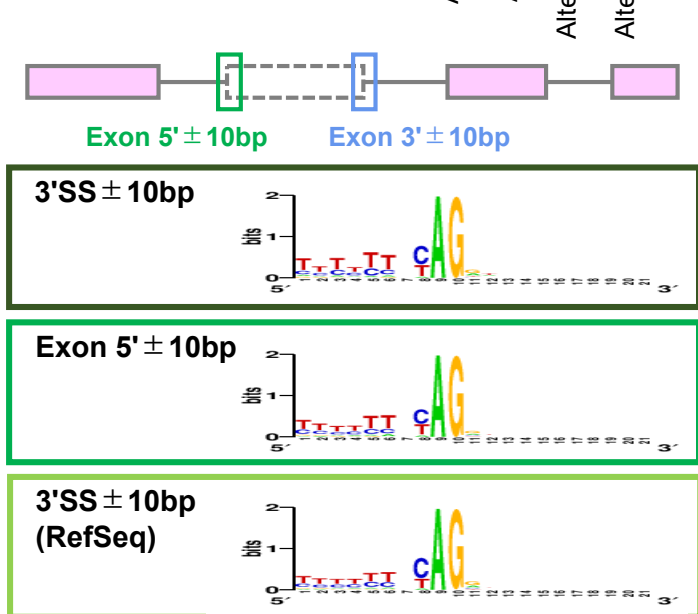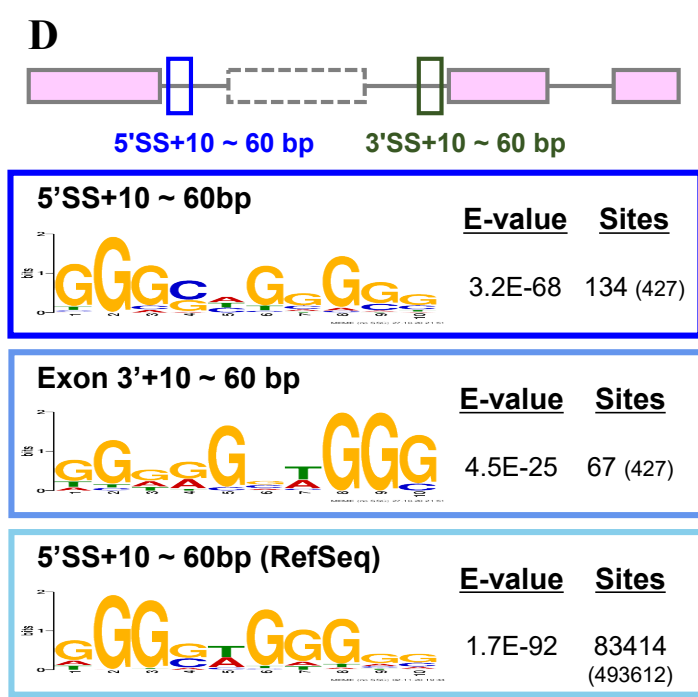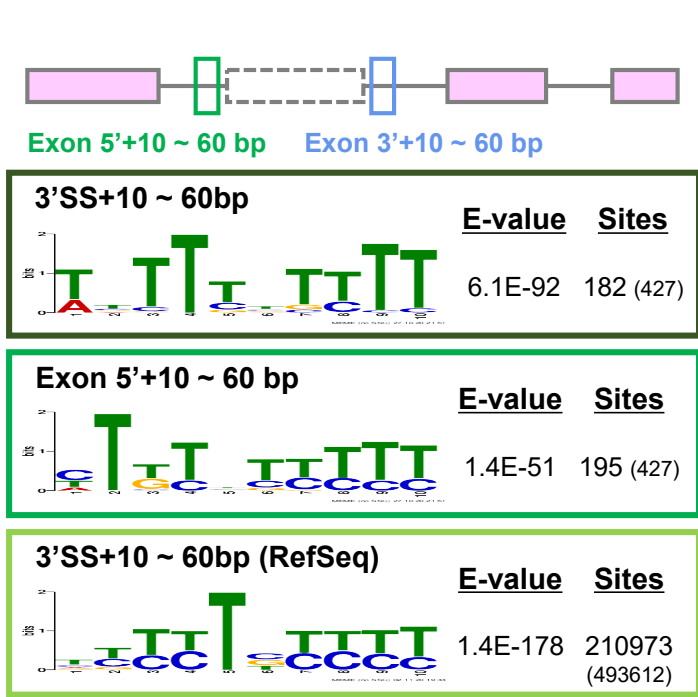

**Fig. S12. Characterization for isoforms in *UPF1*- or *SF3B1*-depleted A549**

(A) Overrepresented motifs in 3' UTR of isoforms in *UPF1*-depleted A549 detected by MEME Suite. (B) The number of isoforms in *SF3B1*-depleted A549 classified into each splicing event. (C) Splicing consensus sequences detected in skipping exons or adjacent junctions of exon-skipping isoforms in *SF3B1*-depleted A549. (D) Overrepresented motifs in skipping exons or adjacent junctions of exon-skipping isoforms in *SF3B1*-depleted A549 detected by MEME Suite. T-rich motifs could be reflected polypyrimidine tract (PPT) where *U2AF* and PPT-binding proteins can bind. G-rich motifs may reflect potential binding sites for heterogeneous nuclear ribonucleoproteins regulating alternative splicing.



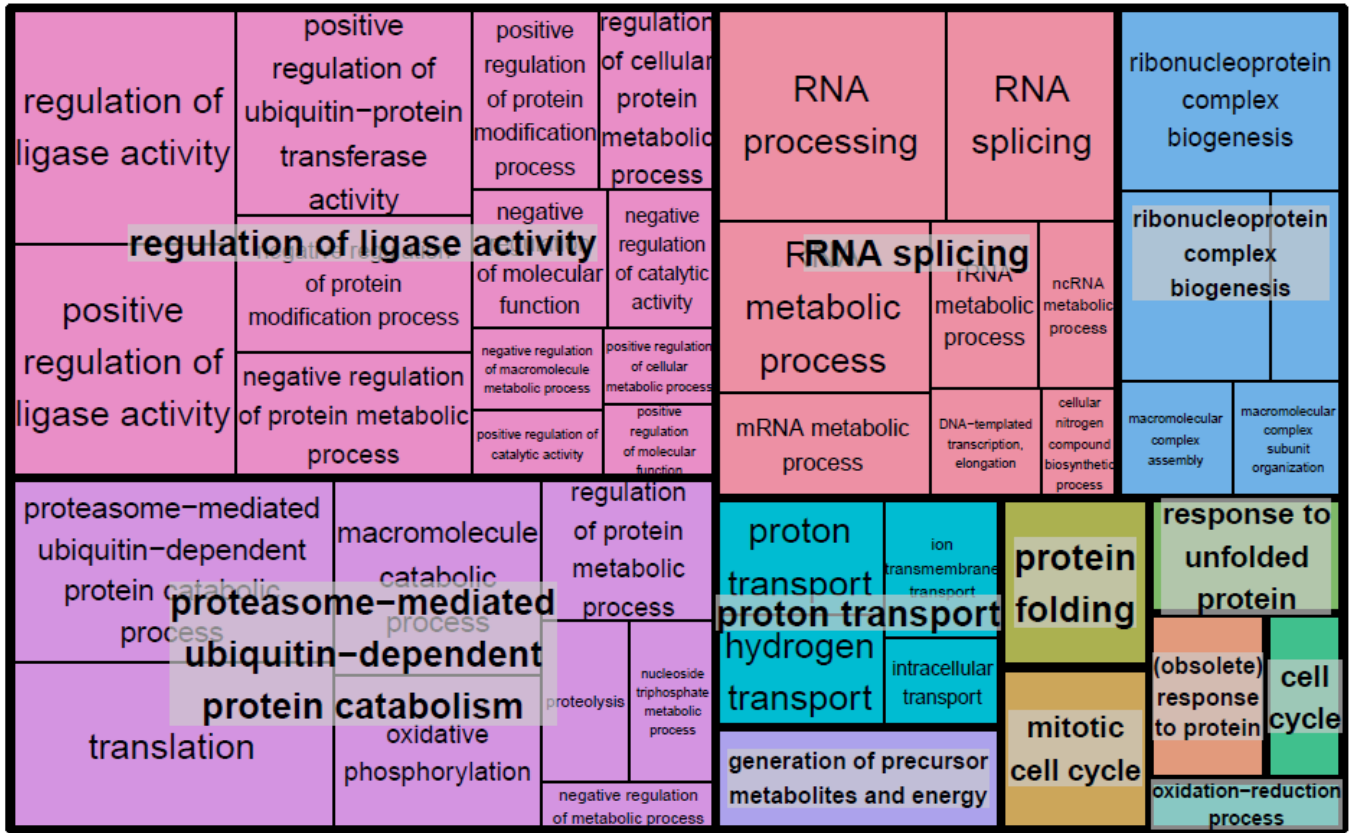

**Fig. S13. Gene ontology analysis for genes with exon-skipping isoforms in *SF3B1*-depleted A549**  
 The results of the gene ontology enrichment analysis were visualized using a REVIGO treemap. The panel sizes in the treemap are inversely proportional to the p-values.

A

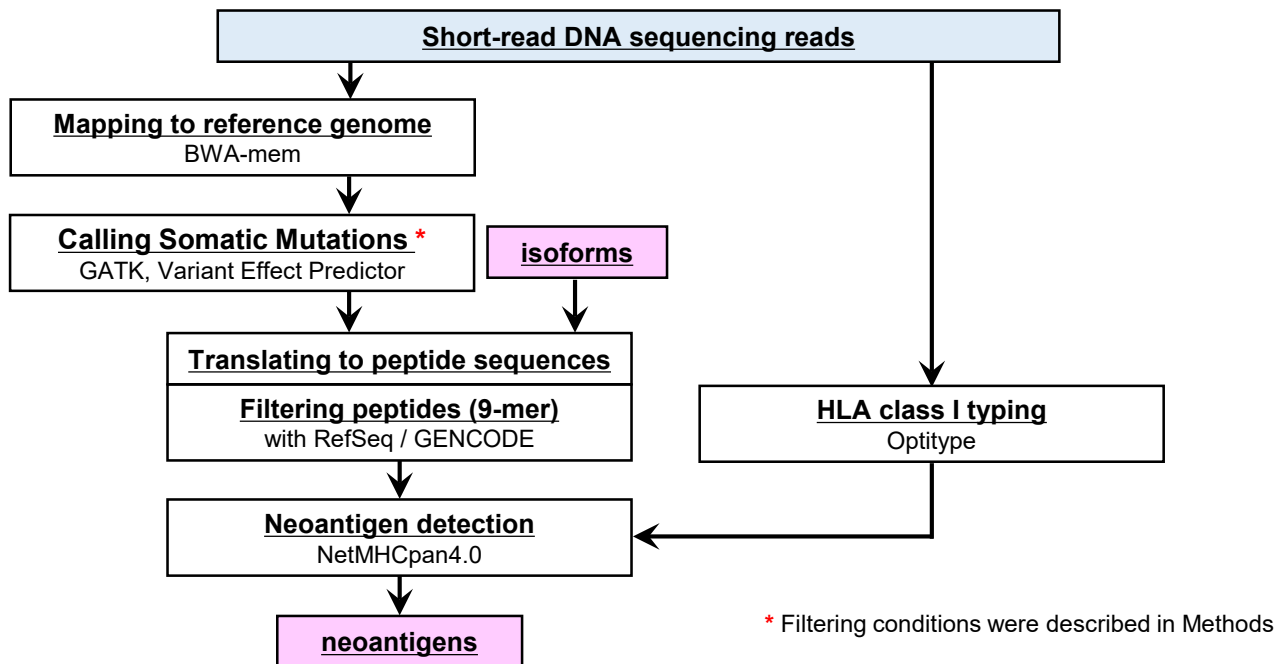

B

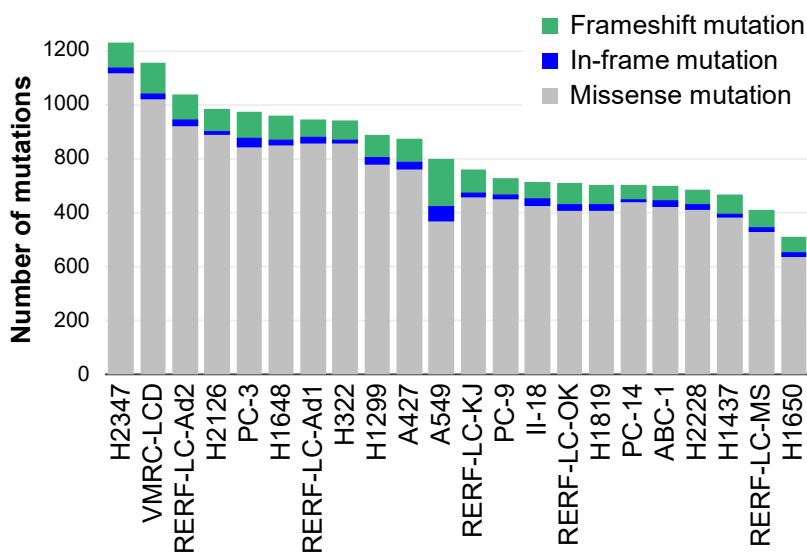

C

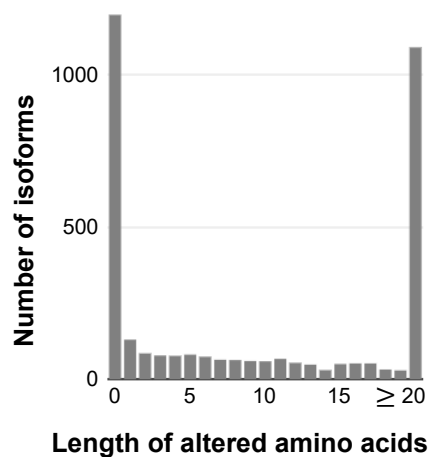

### Fig. S14. Detection of neoantigen candidates

(A) The analysis workflow for detecting neoantigen candidates in combination with the long-read and short-read sequencing datasets. Reads from short-read DNA-seq were mapped to the reference genome using BWA-mem. Somatic mutations were called and annotated by GATK and VEP. HLA typing was performed using OptiType. After translating to peptides from aberrant splicing isoforms and somatic mutations, we extracted all possible 9-mer peptides that were not represented in RefSeq or in the GENCODE. The NetMHC score was calculated by combining the peptide sequences and HLA types. (B) The number of somatic mutations in each cell line. Missense mutations accounted for the majority of the detected mutations. (C) Comparison of the length of changed amino acids in aberrant splicing isoforms using RefSeq.

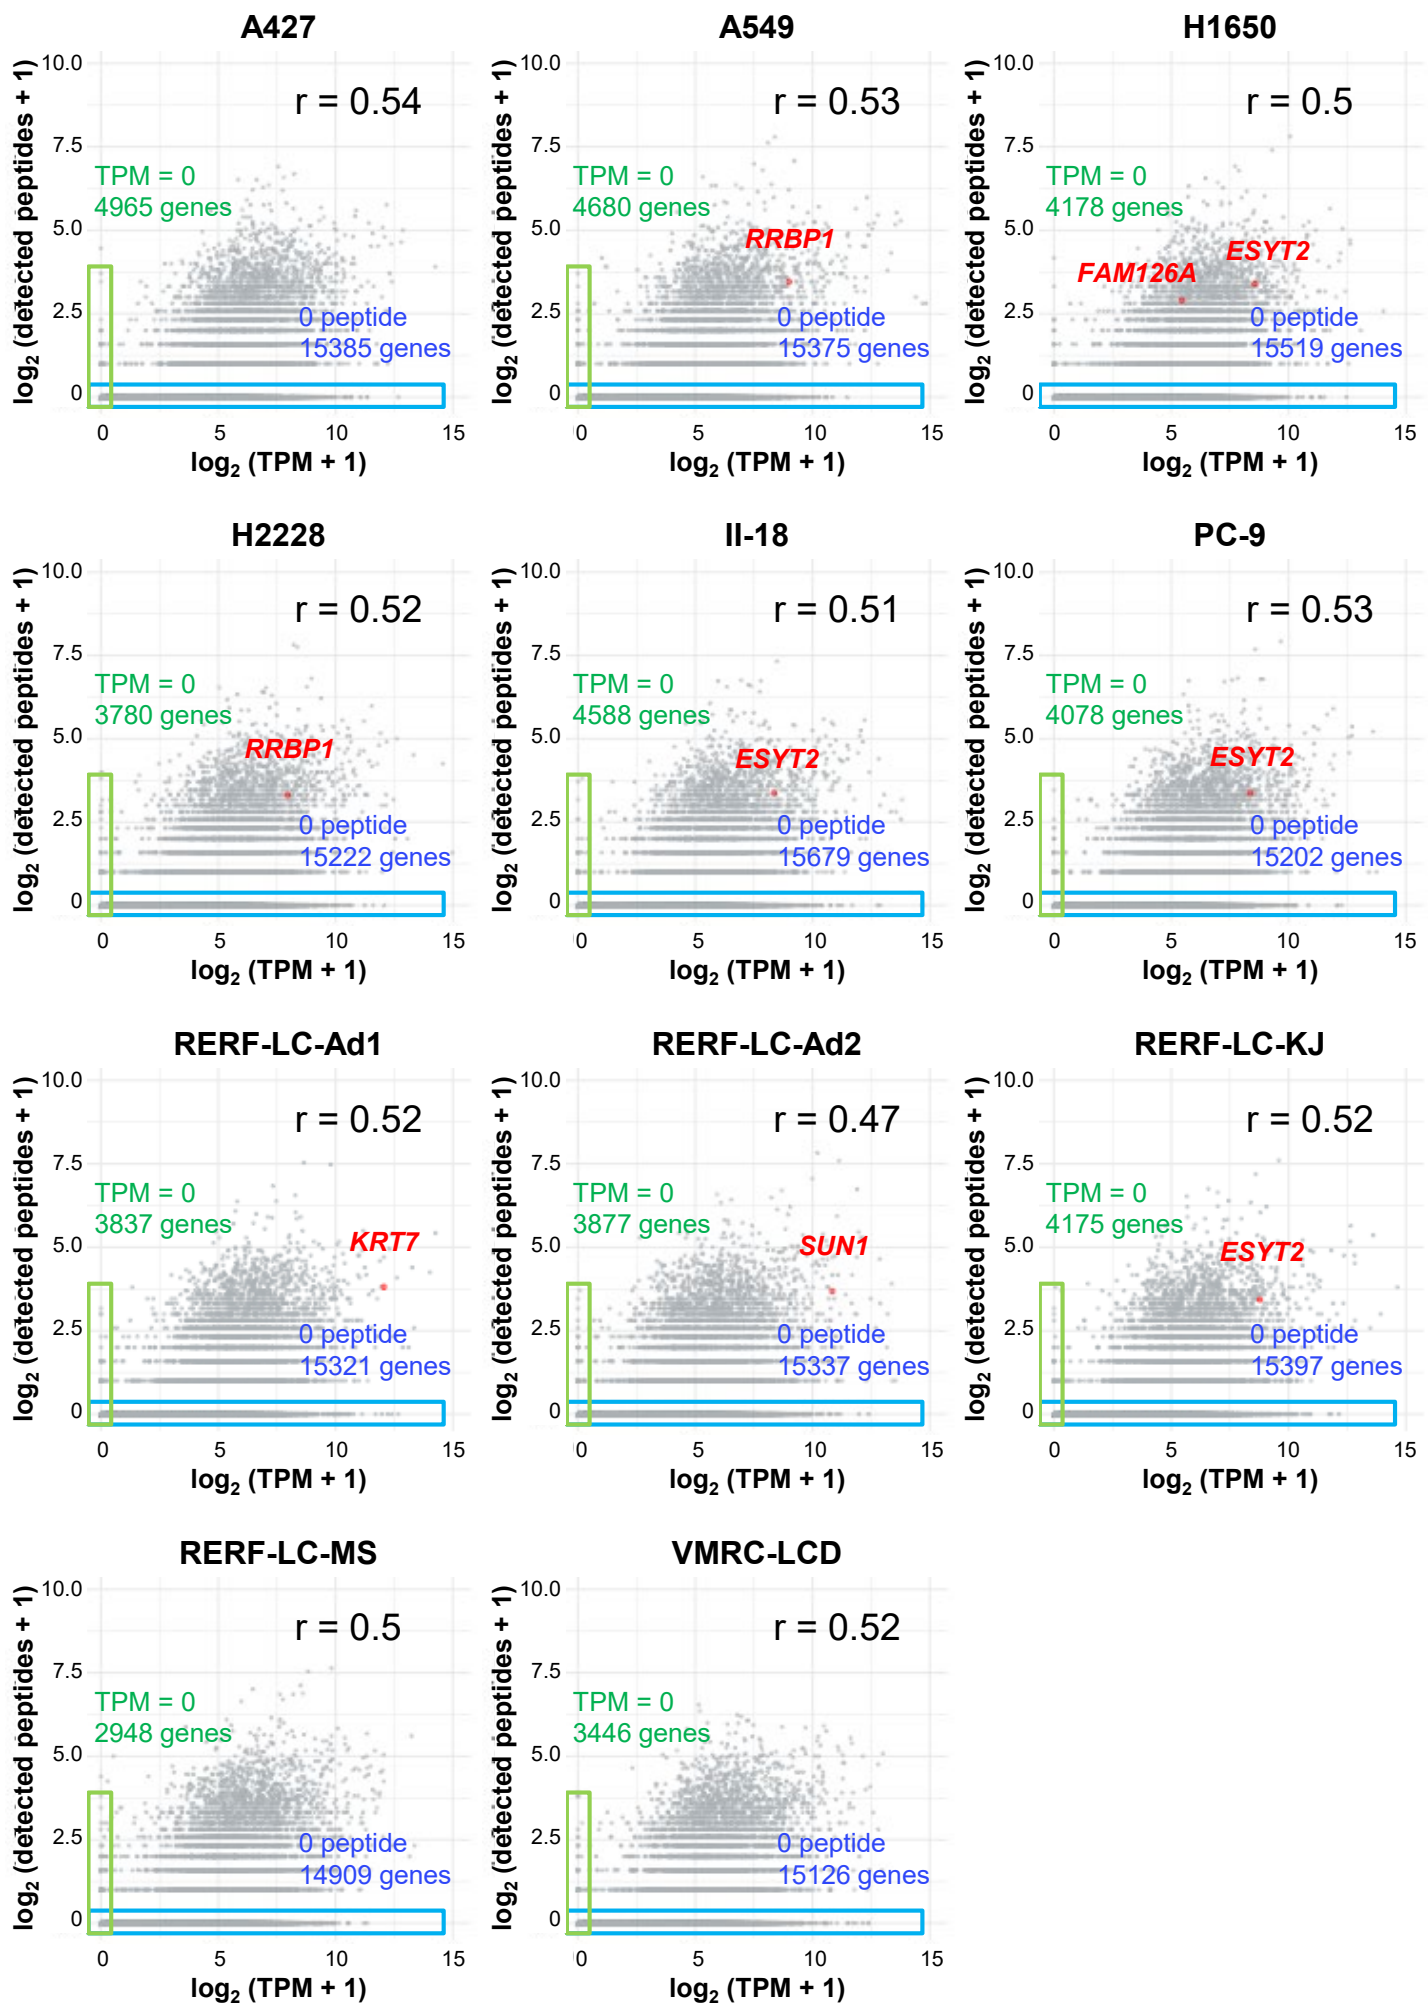

**Fig. S15. Comparisons between the results of short-read RNA sequencing and proteome analysis**  
Correlations between the gene expression levels calculated by short-read RNA sequencing (TPM) and the number of peptides detected by proteome analysis for each gene in the cell lines. Both values + 1 were log<sub>2</sub>-transformed. The red points represent genes with isoforms whose peptides were detected by proteome analysis. The green area highlights 0-TPM genes and the blue area highlights 0-peptide genes.

**A*****ESYT2*, unannotated exon, II-18**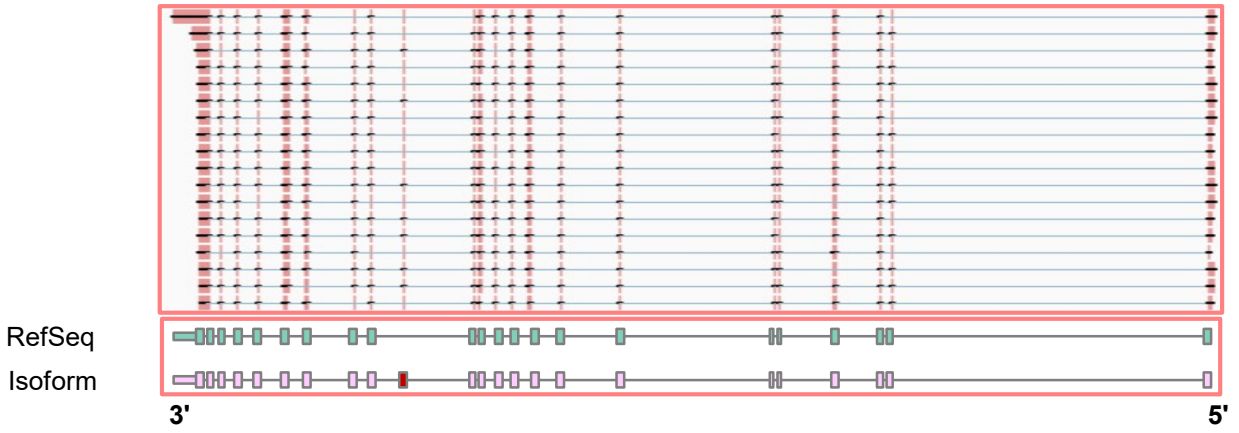**B*****FAM126A*, unannotated exon, H1650**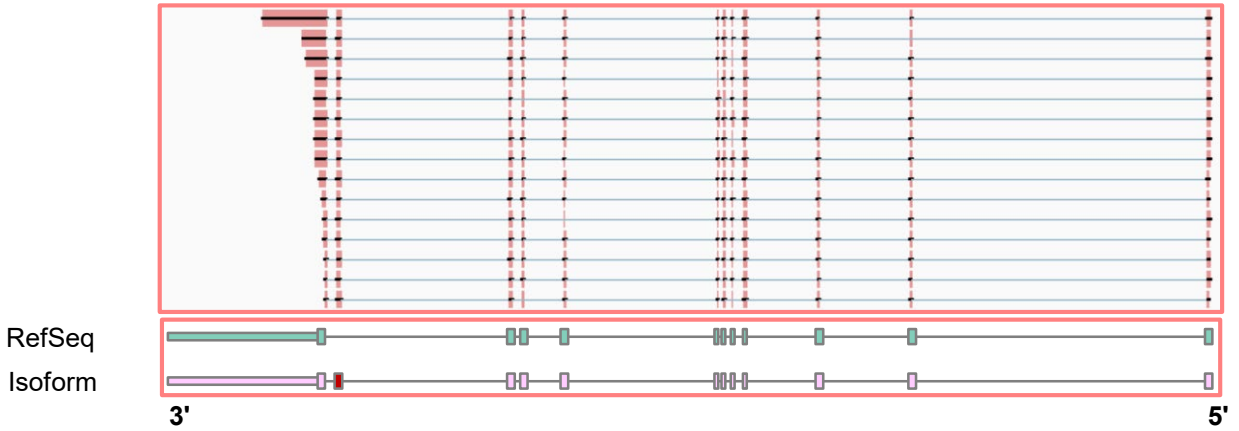**C*****RRBP1*, alternative last exon, H2228**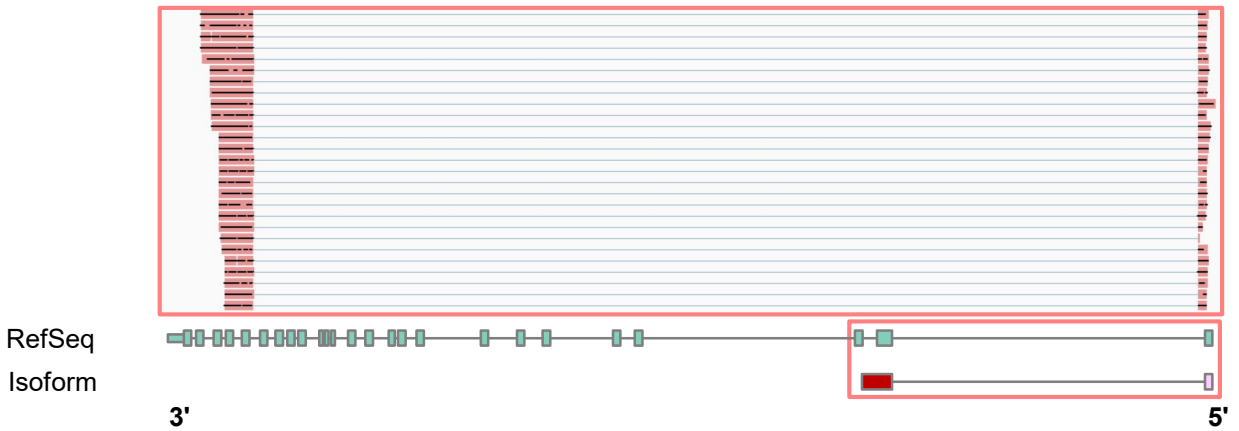**D*****SUN1*, unannotated exon and shuffling, RERF-LC-Ad2**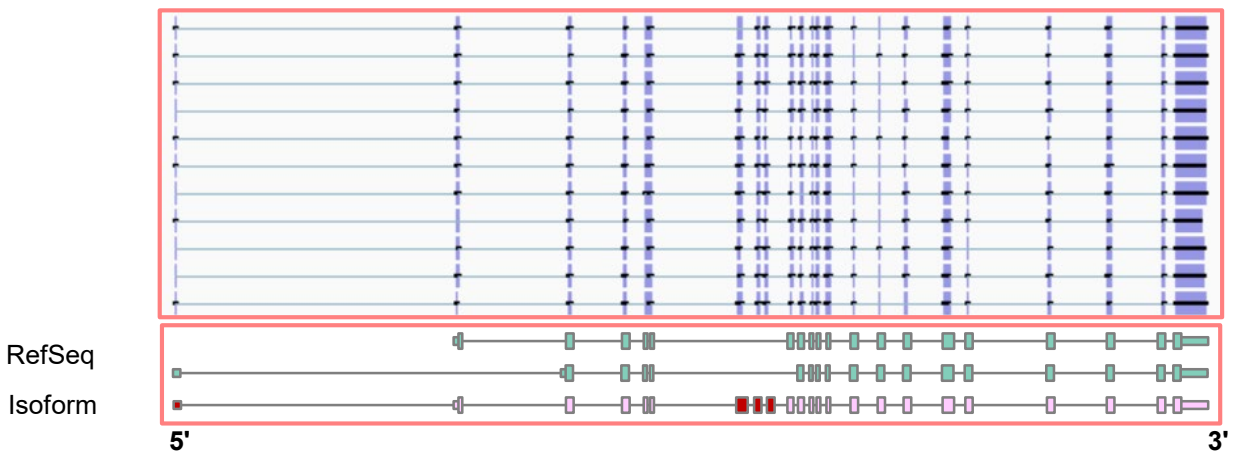

**Fig. S16. Full-length structures of aberrant splicing isoforms detected by the proteome analysis**

(A) The full-length structure of splicing isoforms of *ESYT2* in II-18. Some MinION reads showed an unannotated exon between exons 13 and 14. (B) The full-length structure of splicing isoforms of *FAM126A* in H1650. Some MinION reads showed an unannotated exon between exons 10 and 11. (C) The full-length structure of splicing isoforms of *RRBP1* in H2228. Some MinION reads showed an alternative last exon. (D) The full-length structure of splicing isoforms of *SUNI* in RERF-LC-Ad2. Some MinION reads showed exon shuffling of the first exon and unannotated exons between RefSeq exons 5 and 6.

**A**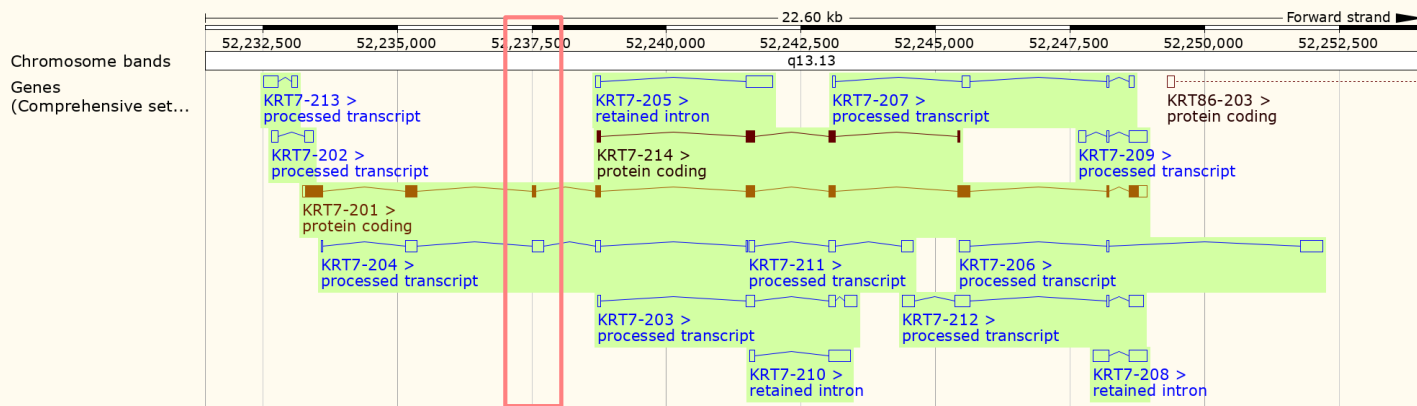**B**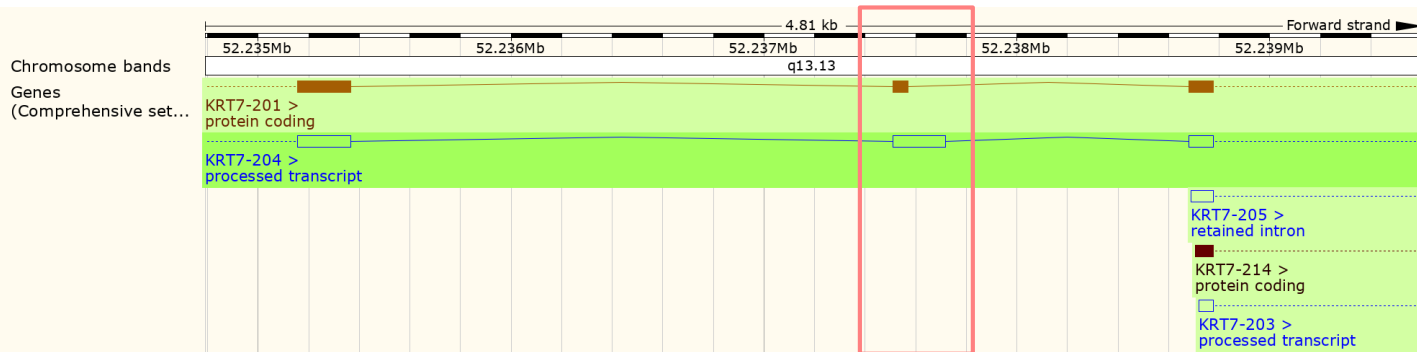

**Fig. S17. *KRT7* transcripts registered in the Ensembl database**

(A, B) Full-length structures of *KRT7* transcripts (A) and a magnified inset of alternative 5' splice site region (B) in Ensembl. *KRT7-204* (ENST00000547613) contained an isoform-specific junction (shown in **Figs. 4g** and **h**).

**A**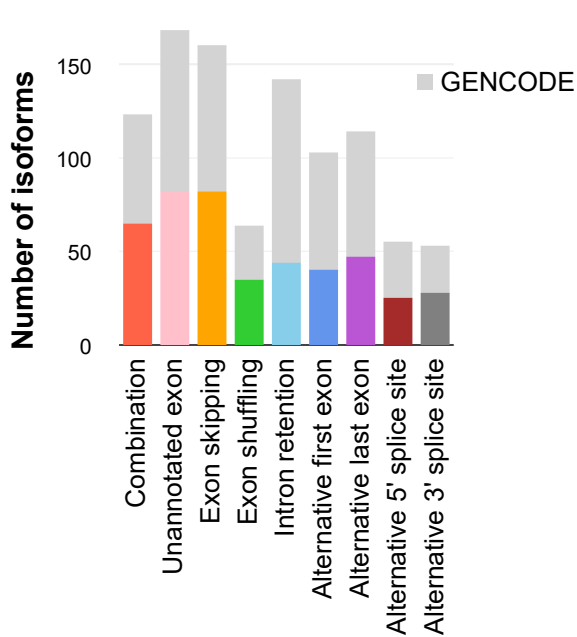**B**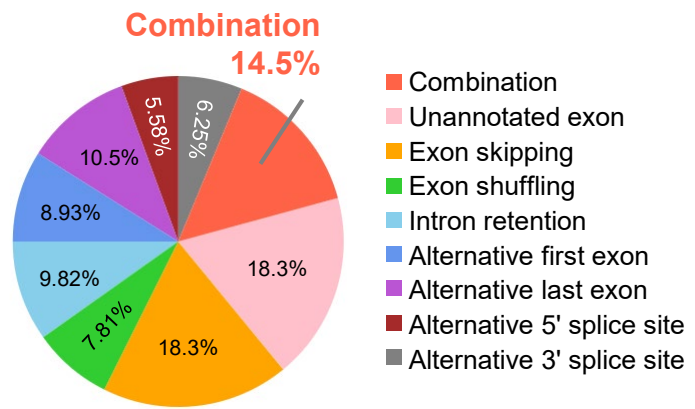**C**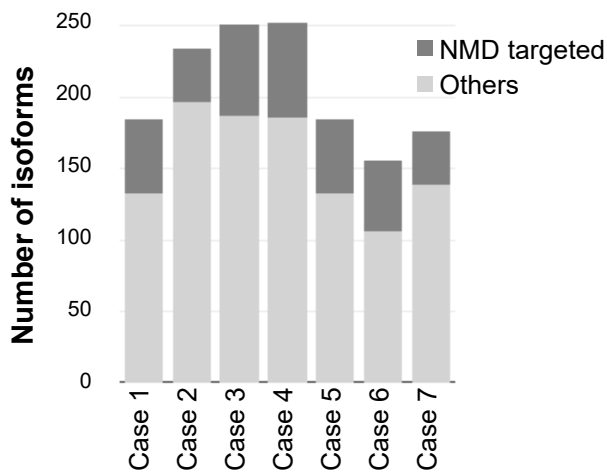**D**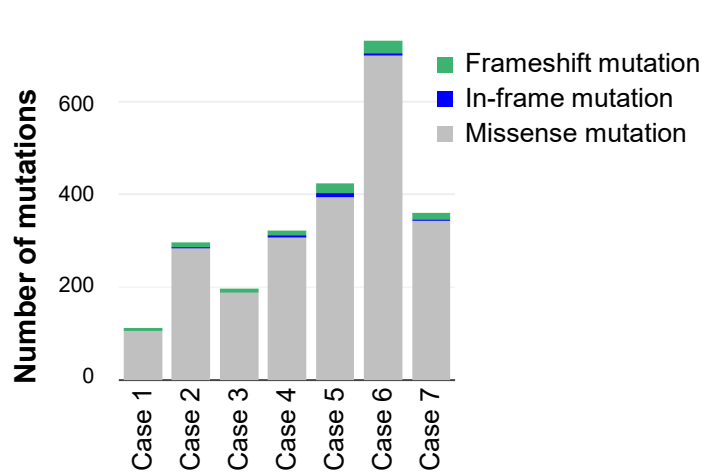

### Fig. S18. Aberrant splicing isoforms detected in clinical specimens

(A) The number of isoforms classified for each splicing event. Light gray bars indicate isoforms represented in GENCODE, and other-colored bars indicate unannotated isoforms. (B) The proportion of splicing events in unannotated isoforms. Combination patterns accounted for 14.5%. (C) The number of PTC-containing splicing isoforms in each specimen are shown in gray. (D) The number of somatic mutations in each specimen.



**A** *CEACAM6*, Alternative last exon, Case 4

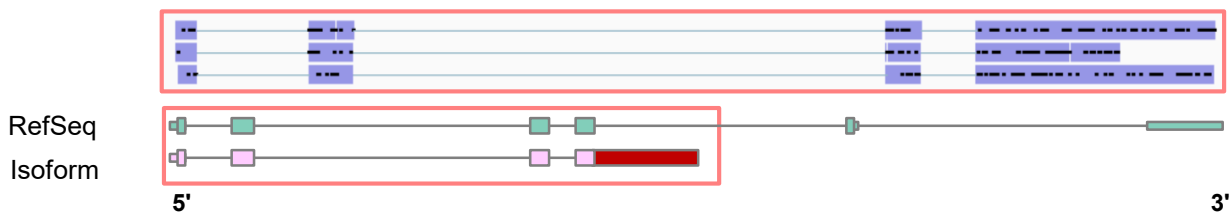

**B** *ERO1A*, Alternative last exon, Case 2

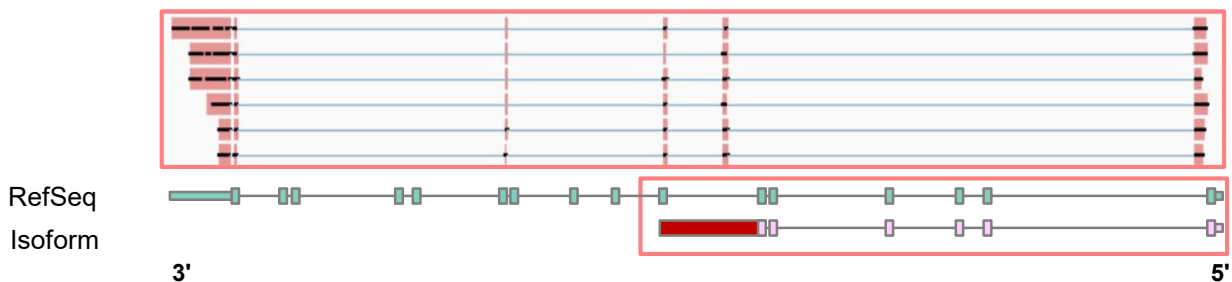

**C** *HOOK2*, Alternative last exon, Case 7

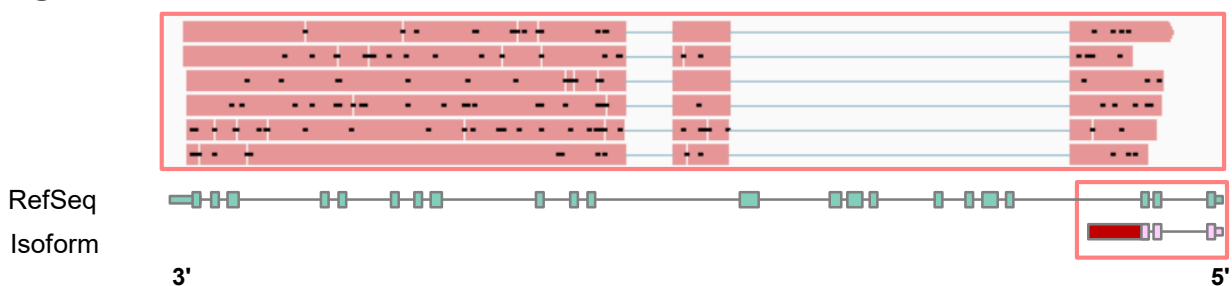

**D** *MCEE*, Alternative 5' splice\_site, Case 7

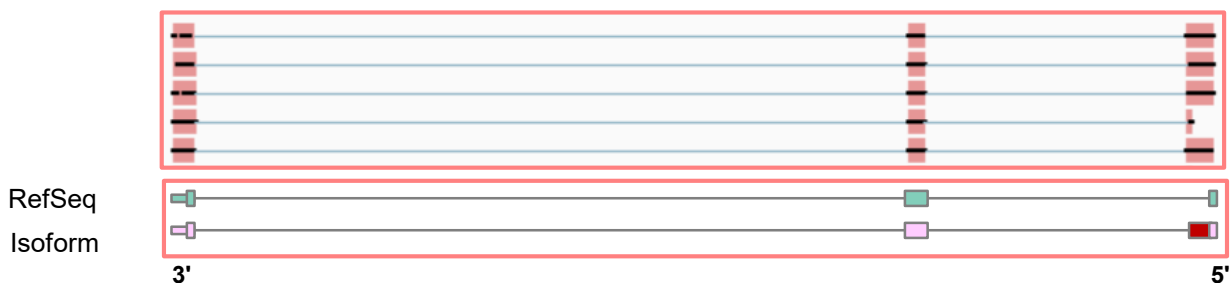

**E** *PKM*, Alternative last exon, Case 4

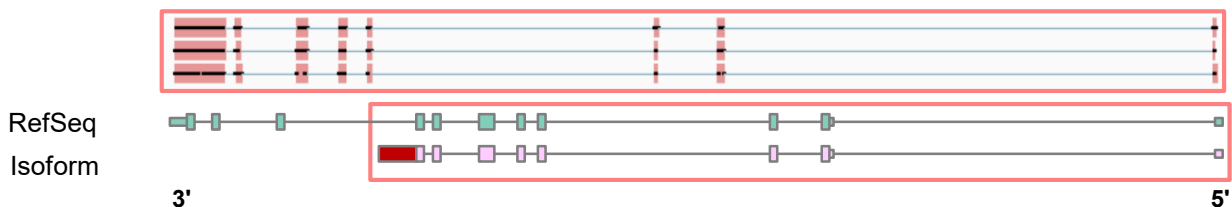

**F** *SCGB3A2*, Unannotated exon, Case 6

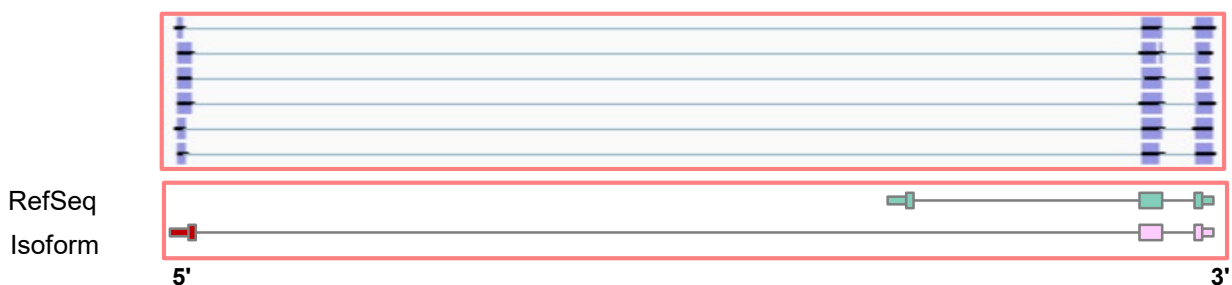

**G** *SELENBP1*, Intron retention, Case 4

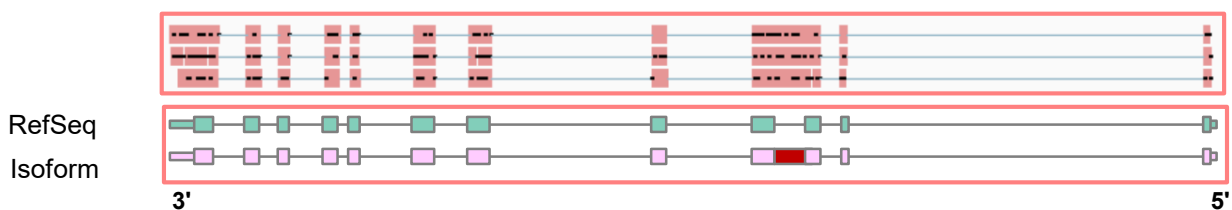

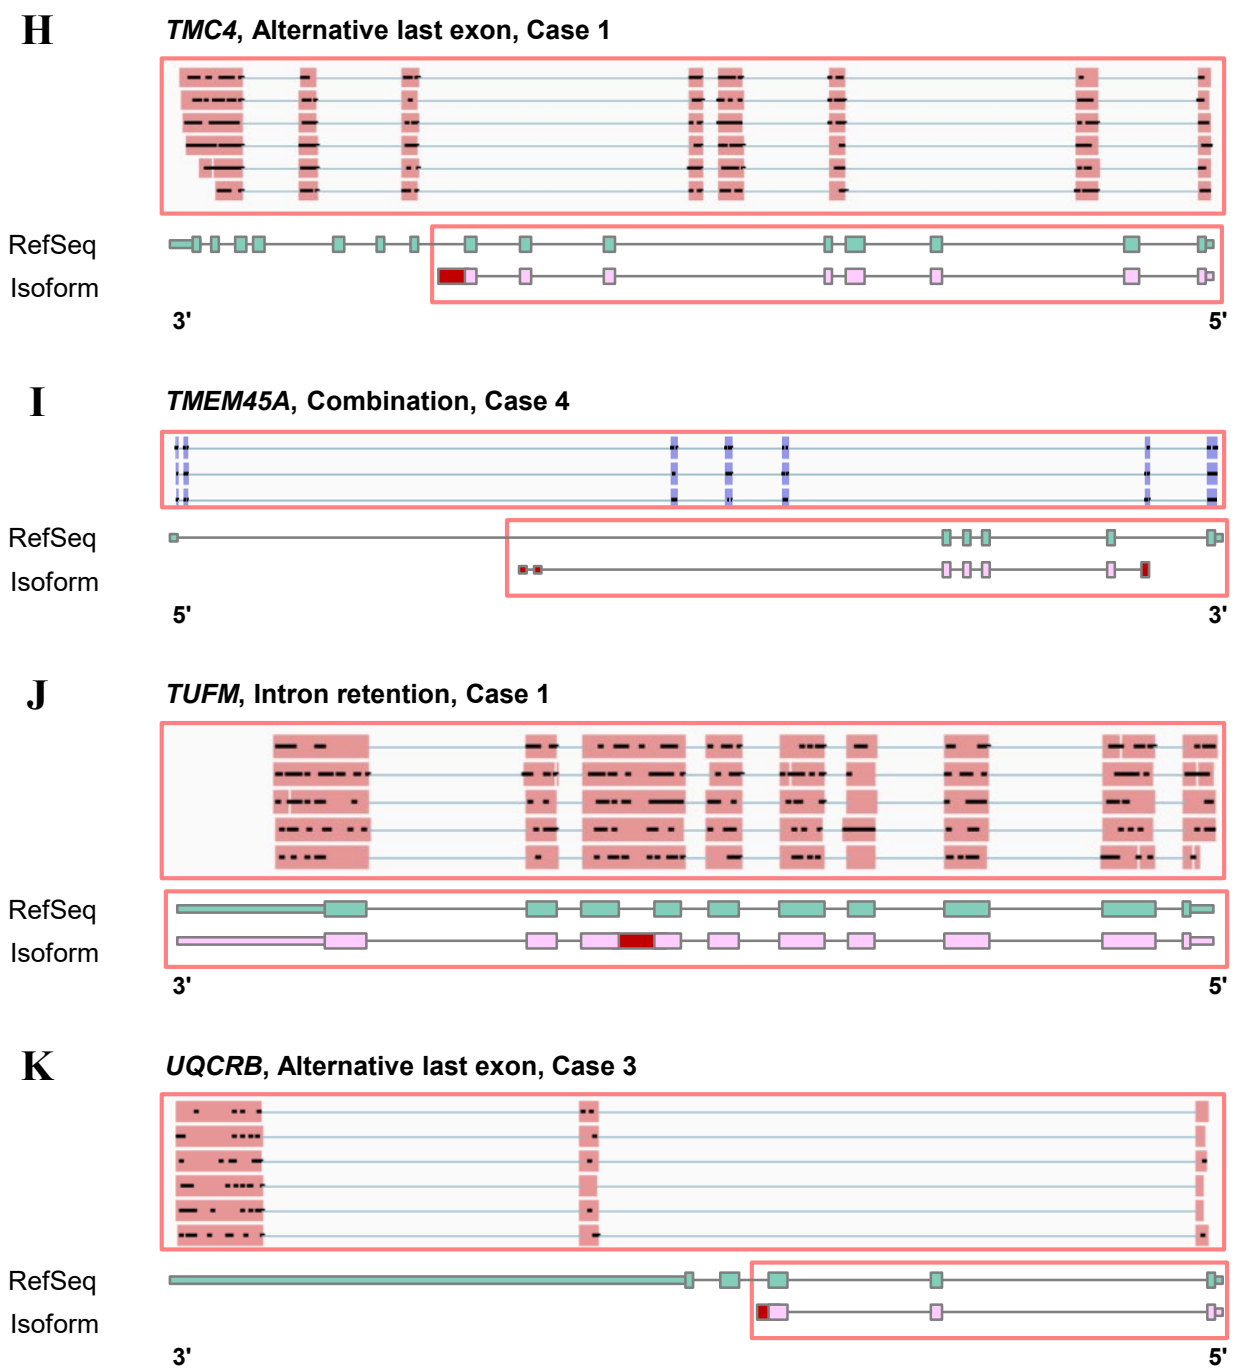

**Fig. S19. Full-length structures of aberrant splicing isoforms tested in ELISpot assays**

(A) The full-length structure of splicing isoforms of *CEACAM6* in case 4. Some MinION reads showed an alternative last exon. (B) The full-length structure of splicing isoforms of *ERO1A* in case 2. Some MinION reads showed an alternative last exon. (C) The full-length structure of splicing isoforms of *HOOK2* in case 7. Some MinION reads showed an alternative last exon. (D) The full-length structure of splicing isoforms of *MCEE* in case 7. Some MinION reads showed an alternative 5' splice site in the first exon. (E) The full-length structure of splicing isoforms of *PKM* in case 4. Some MinION reads showed an alternative last exon. (F) The full-length structure of splicing isoforms of *SCGB3A2* in case 6. Some MinION reads showed an unannotated exon before the first exon. (G) The full-length structure of splicing isoforms of *SELENBP1* in case 4. Some MinION reads showed intron retention between exons 3 and 4. (H) The full-length structure of splicing isoforms of *TMC4* in case 1. Some MinION reads showed an alternative last exon. (I) The full-length structure of splicing isoforms of *TMEM45A* in case 4. Some MinION reads showed unannotated exons before exon 2 and after exon 5 of RefSeq. (J) The full-length structure of splicing isoforms of *TUFM* in case 1. Some MinION reads showed intron retention between exons 7 and 8. (K) The full-length structure of splicing isoforms of *UQCRB* in case 3. Some MinION reads showed an alternative last exon.

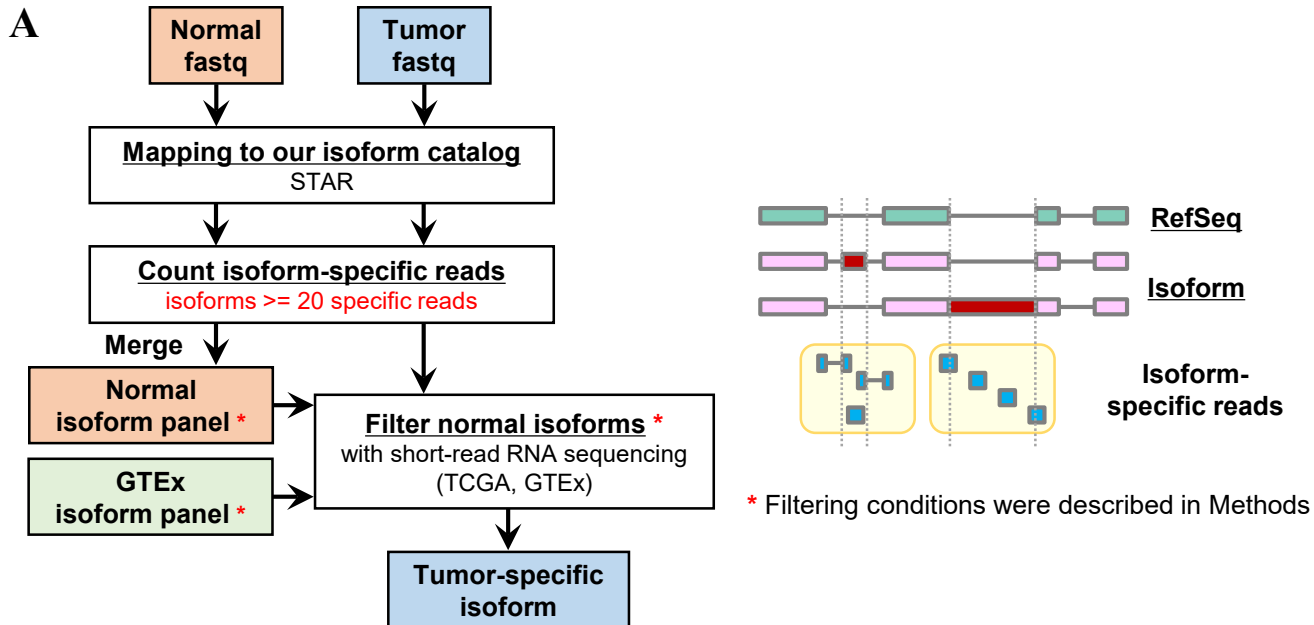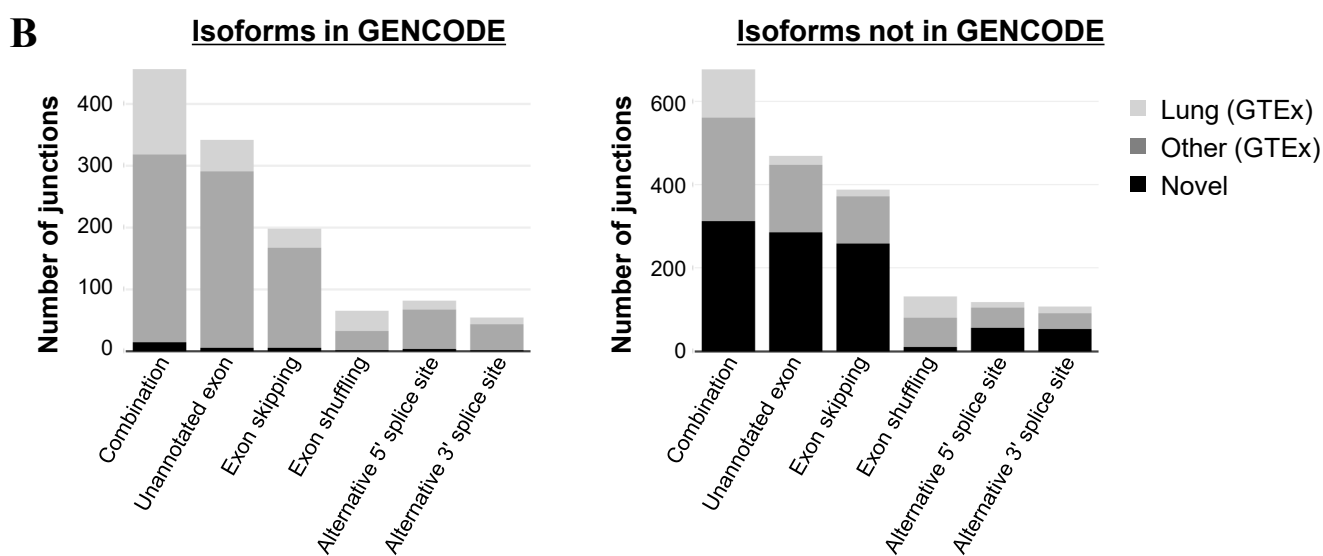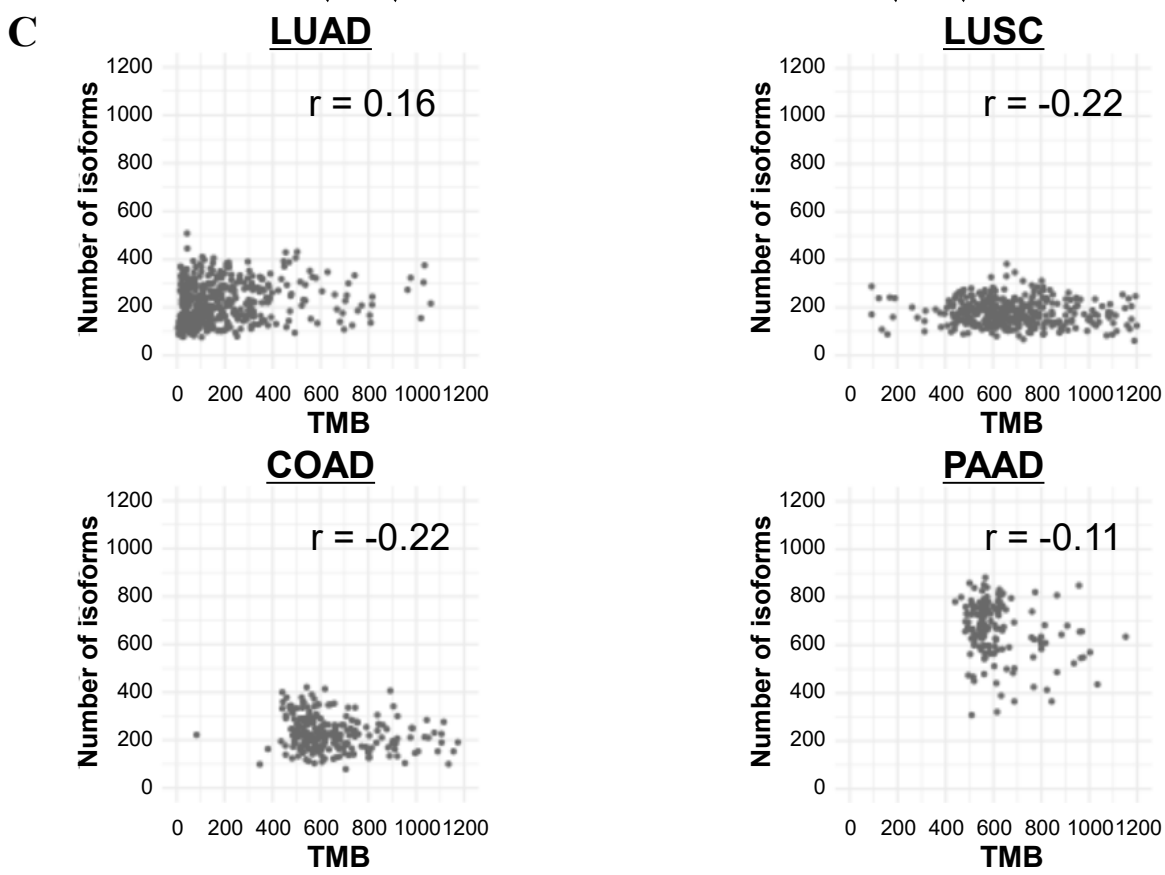

**D****LUAD**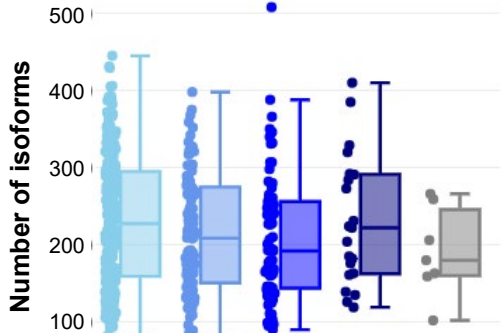**LUSC**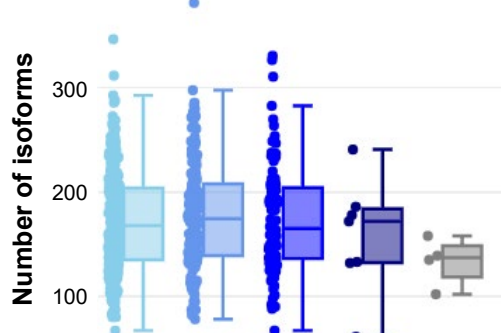**COAD**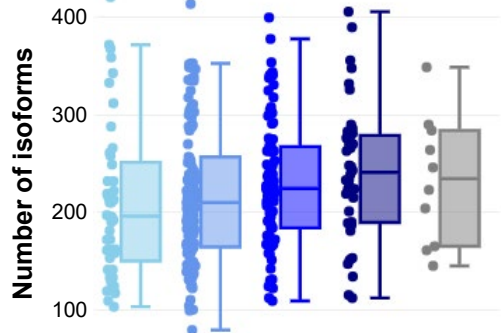**PAAD**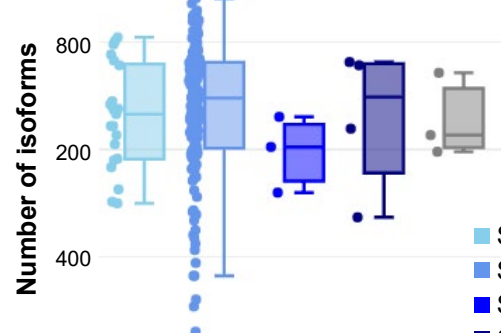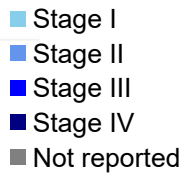**E****LUAD**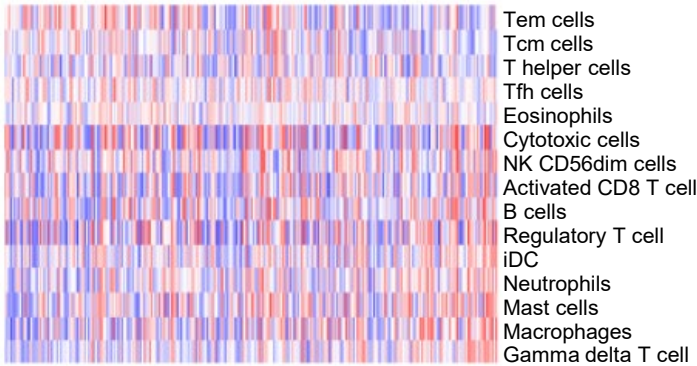**LUSC**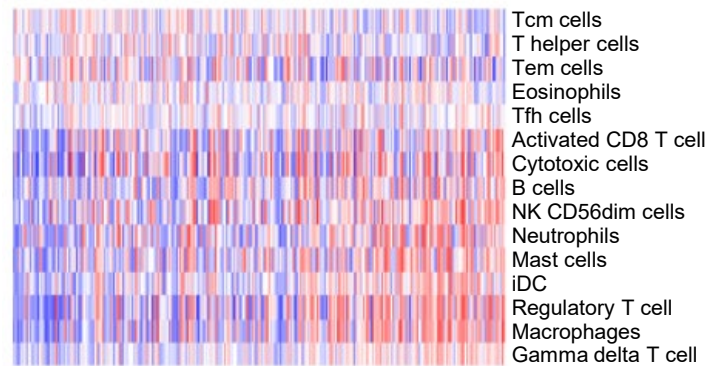**COAD**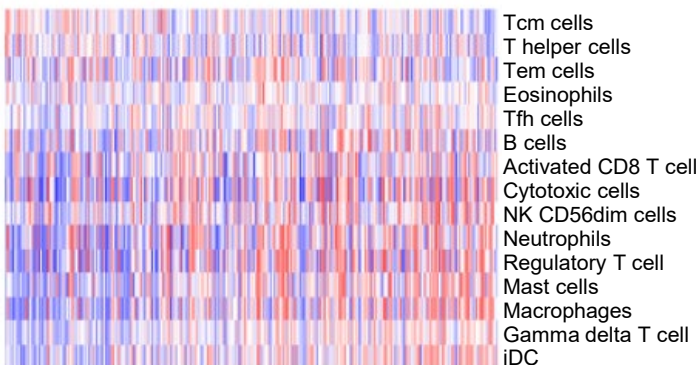**PAAD**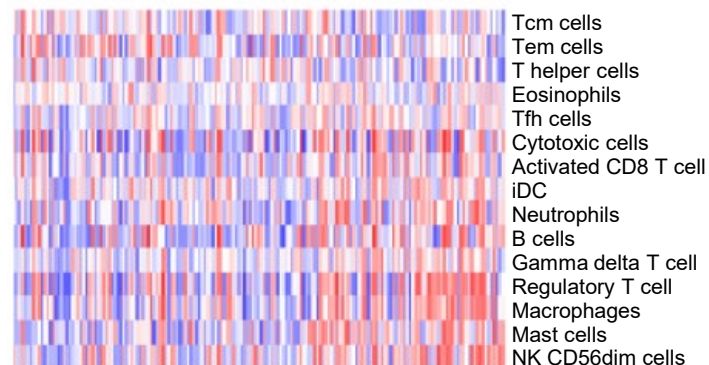**GSVA score**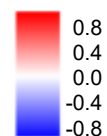

### **Fig. S20. Overview of analysis using TCGA datasets**

(A) The analysis workflow for counting aberrant isoforms in the TCGA datasets using our isoform catalog. Reads from short-read RNA sequencing of TCGA were mapped to the reference genome and our reference catalog using STAR. Reads aligned to isoform-specific regions were counted, and extracted isoforms covered at least 20 reads. A normal reference panel was created by merging normal datasets to extract tumor-specific isoforms. We also removed isoforms whose junctions were expressed in the lung tissues of the GTEx database. (B) The number of junctions found in the GTEx datasets in isoforms that were represented in GENCODE (left panel) and not represented in GENCODE (right panel). (C) Correlation between the number of isoforms and the TMB in the TCGA datasets for lung adenocarcinoma (LUAD), lung squamous cell carcinoma (LUSC), colon adenocarcinoma (COAD) and pancreatic adenocarcinoma (PAAD). No significant correlation was observed. (D) Comparisons of the distribution of the number of isoforms in specimens in each cancer stage. (E) Heatmaps showing the GSVA enrichment scores of gene sets of specific immune cell signatures.
